# Supplementary material
Source: ML conference proceedings conference paper supplement (https://openreview.net/forum?id=QSJKrO1Qpy)
Supplement: supplementary_material [file attachment]

# Supplementary Material for “Hodge-Aware Learning on Simplicial Complexes”

## A Illustration for Background

This paper relies on the Hodge decomposition and the spectral simplicial theory. To ease the exposition, we illustrate them for the edge flow space. We refer to [27, 26, 30] for more details.

### A.1 Hodge decomposition of an edge flow

Given an edge flow  $\mathbf{x}_1$ , the Hodge decomposition in Theorem 1 gives

$$\mathbf{x}_1 = \mathbf{x}_{1,G} + \mathbf{x}_{1,C} + \mathbf{x}_{1,H} \quad (\text{A.1})$$

with  $\mathbf{x}_{1,G} = \mathbf{B}_1^\top \mathbf{x}_0$  for some node signal  $\mathbf{x}_0$ , and  $\mathbf{x}_{1,C} = \mathbf{B}_2 \mathbf{x}_2$  for some triangle signal  $\mathbf{x}_2$ , and  $\mathbf{x}_{1,H}$  follows  $\mathbf{B}_1 \mathbf{x}_{1,H} = \mathbf{0}$  and  $\mathbf{B}_2^\top \mathbf{x}_{1,H} = \mathbf{0}$ .

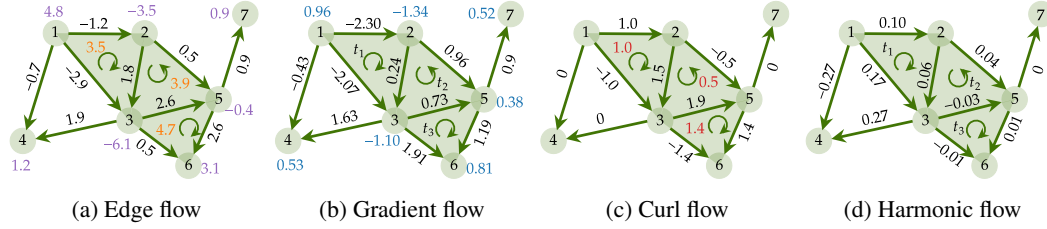

Figure A.1: Hodge decomposition of an edge flow. (b)-(d) are the Hodge decomposition of the example edge flow in (a) (we denote its divergence and curl in purple and orange, respectively). The gradient flow is the gradient of some node signal (in blue) and is curl-free. The curl flow can be obtained from some triangle flow (in red), and is divergence-free. The harmonic flow has zero divergence and zero curl, which is circulating around the hole  $\{1, 3, 4\}$ . Note that in this figure and Fig. A.2 the flow numbers are rounded up to two decimal places. Thus, at some nodes or triangles with zero-divergence or zero-curl, the divergence or curl might not be exactly zero.

### A.2 Spectral simplicial theory

Here we show how the eigenvalues of  $\mathbf{L}_k$  carry the notion of simplicial frequency [30]. Specifically, we show for  $k = 1$  an eigenvalue measures the total divergence or curl of the eigenvector.

- *Gradient Frequency*: the nonzero eigenvalues associated with the eigenvectors  $\mathbf{U}_{1,G}$  of  $\mathbf{L}_{1,d}$ , which span the gradient space  $\text{im}(\mathbf{B}_1^\top)$ , admit  $\mathbf{L}_{1,d} \mathbf{u}_{1,G} = \lambda_{1,G} \mathbf{u}_{1,G}$  for any eigenpair  $\mathbf{u}_{1,G}$  and  $\lambda_{1,G}$ . Thus, we have  $\lambda_{1,G} = \mathbf{u}_{1,G}^\top \mathbf{L}_{1,d} \mathbf{u}_{1,G} = \mathbf{u}_{1,G}^\top \mathbf{B}_1^\top \mathbf{B}_1 \mathbf{u}_{1,G} = \|\mathbf{B}_1 \mathbf{u}_{1,G}\|_2^2$ , which is an Euclidean norm of the divergence, i.e., the total nodal variation of  $\mathbf{u}_{1,G}$ . If an eigenvector has a larger eigenvalue, it has a larger total divergence. For the SFT of an edge flow, if the gradient embedding  $\tilde{\mathbf{x}}_{1,G}$  has a large weight on such an eigenvector, it contains components with a large divergence, and we say it has a large gradient frequency. Thus, we call such eigenvalues associated with  $\mathbf{U}_{1,G}$  gradient frequencies.
- *Curl Frequency*: the nonzero eigenvalues associated with the eigenvectors  $\mathbf{U}_{1,C}$  of  $\mathbf{L}_{1,u}$ , which span the curl space  $\text{im}(\mathbf{B}_2)$ , admit  $\mathbf{L}_{1,u} \mathbf{u}_{1,C} = \lambda_{1,C} \mathbf{u}_{1,C}$  for any eigenpair  $\mathbf{u}_{1,C}$  and  $\lambda_{1,C}$ . Thus, we have  $\lambda_{1,C} = \mathbf{u}_{1,C}^\top \mathbf{L}_{1,u} \mathbf{u}_{1,C} = \mathbf{u}_{1,C}^\top \mathbf{B}_2 \mathbf{B}_2^\top \mathbf{u}_{1,C} = \|\mathbf{B}_2^\top \mathbf{u}_{1,C}\|_2^2$ , which is an Euclidean norm of the curl, i.e., the total rotational variation of  $\mathbf{u}_{1,C}$ . If an eigenvector has a larger eigenvalue, it has a larger total curl. For the SFT of an edge flow, if the curl embedding  $\tilde{\mathbf{x}}_{1,C}$  has a large weight on such an eigenvector, it contains components with a large curl, and we say it has a large curl frequency. Thus, we call such eigenvalues associated with  $\mathbf{U}_{1,C}$  curl frequencies.
- *Harmonic Frequency*: the zero eigenvalues associated with the eigenvectors  $\mathbf{U}_{1,H}$ , which span the harmonic space  $\text{ker}(\mathbf{L}_1)$ , admit  $\mathbf{L}_1 \mathbf{u}_{1,H} = \mathbf{0}$  for any eigenpair  $\mathbf{u}_{1,H}$  and  $\lambda_{1,H} = 0$ .

From the definition of  $\mathbf{L}_1$ , we have  $\mathbf{B}_1 \mathbf{u}_{1,H} = \mathbf{B}_2^\top \mathbf{u}_{1,H} = \mathbf{0}$ . That is, the eigenvector  $\mathbf{u}_{1,H}$  is divergence- and curl-free. We also say such an eigenvector has zero signal variation in terms of the nodes and triangles. This resembles the constant graph signal in the node space. We call such zero eigenvalues as harmonic frequencies.

**Fig. A.2** shows the simplicial Fourier basis and the corresponding simplicial frequencies of the SC, from which we see how the eigenvalues of  $\mathbf{L}_1$  can be interpreted as the simplicial frequencies.

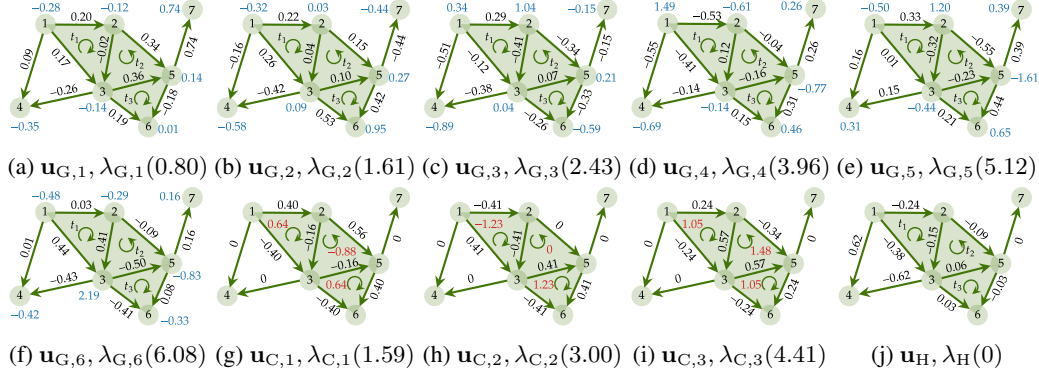

Figure A.2: (a)-(f) Six gradient frequencies and the corresponding Fourier basis. We also annotate their divergences, and we see that these eigenvectors with a small eigenvalue have a small magnitude of total divergence, i.e., the edge flow variation in terms of the nodes. Gradient frequencies reflect the nodal variations. (g)-(i) Three curl frequencies and the corresponding Fourier basis. We annotate their curls and we see that these eigenvectors with a small eigenvalue have a small magnitude of total curl, i.e., the edge flow variation in terms of the triangles. Curl frequencies reflect the rotational variations. (j) Harmonic basis with a zero frequency, which has a zero nodal and zero rotational variation.

For  $k = 0$ , the eigenvalues of  $\mathbf{L}_0$  carry the notion of graph frequency, which measures the graph (node) signal smoothness w.r.t. the upper adjacent simplices, i.e., edges. Thus, the curl frequency of  $k = 0$  coincides with the graph frequency and a constant graph signal has only harmonic frequency component, and there is no divergence frequency. For a more general  $k$ , there exist these three types of simplicial frequencies, which measure the  $k$ -simplicial signal total variations in terms of faces and cofaces.

## B Illustrated Simplicial Complex CNNs and Details on Properties

We give two examples where the first is a SCCNN on a SC of order two, and the second is the form of SCCNN with multi-features.

*Example 13.* For  $k = 2$ , a SCCNN layer reads as

$$\begin{aligned} \mathbf{x}_0^l &= \sigma(\mathbf{H}_0^l \mathbf{x}_0^{l-1} + \mathbf{H}_{0,u}^l \mathbf{B}_1 \mathbf{x}_1^{l-1}), \\ \mathbf{x}_1^l &= \sigma(\mathbf{H}_{1,d}^l \mathbf{B}_1^\top \mathbf{x}_0^{l-1} + \mathbf{H}_1^l \mathbf{x}_1^{l-1} + \mathbf{H}_{1,u}^l \mathbf{B}_2 \mathbf{x}_2^{l-1}), \\ \mathbf{x}_2^l &= \sigma(\mathbf{H}_{2,d}^l \mathbf{B}_2^\top \mathbf{x}_1^{l-1} + \mathbf{H}_2^l \mathbf{x}_2^{l-1}). \end{aligned} \quad (\text{B.1})$$

Recursively, we see that a SCCNN layer takes as inputs  $\{\mathbf{x}_0^{l-1}, \mathbf{x}_0^{l-2}, \mathbf{x}_1^{l-2}, \mathbf{x}_2^{l-2}\}$  to compute  $\mathbf{x}_0^l$ . One may find this familiar as some type of skip connections in GNNs [65].

*Example 14 (Multi-Feature SCCNN).* A multi-feature SCCNN at layer  $l$  takes  $\{\mathbf{X}_{k-1}^{l-1}, \mathbf{X}_k^{l-1}, \mathbf{X}_{k+1}^{l-1}\}$  as inputs, each of which has  $F_{l-1}$  features, and generates an output  $\mathbf{X}_k^l$  with  $F_l$  features as

$$\begin{aligned} \mathbf{X}_k^l &= \sigma \left( \sum_{t=0}^{T_d} \mathbf{L}_{k,d}^t \mathbf{B}_k^\top \mathbf{X}_{k-1}^{l-1} \mathbf{W}_{k,d,t}^l + \sum_{t=0}^{T_d} \mathbf{L}_{k,d}^t \mathbf{X}_k^{l-1} \mathbf{W}_{k,d,t}^l \right. \\ &\quad \left. + \sum_{t=0}^{T_u} \mathbf{L}_{k,u}^t \mathbf{X}_k^{l-1} \mathbf{W}_{k,u,t}^l + \sum_{t=0}^{T_u} \mathbf{L}_{k,u}^t \mathbf{B}_{k+1} \mathbf{X}_{k+1}^{l-1} \mathbf{W}_{k,u,t}^l \right) \end{aligned} \quad (\text{B.2})$$

where  $\mathbf{L}^t$  indicates the matrix  $t$ -power of  $\mathbf{L}$ , while superscript  $l$  indicates the layer index.

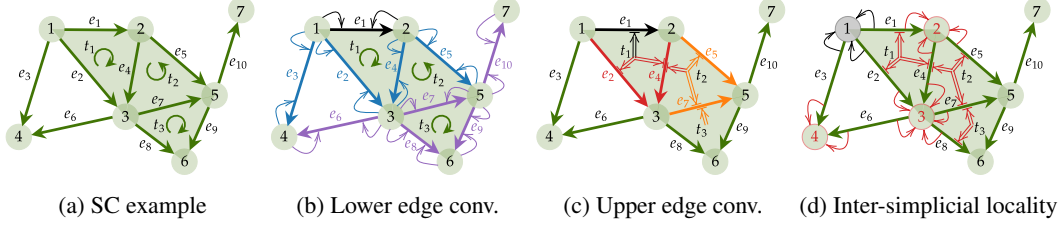

Figure B.1: (a) A SC where arrows indicate the reference orientations of edges and triangles. 2-simplices are (filled) triangles shaded in green and open triangle  $\{1, 3, 4\}$  is not in the SC. (b) Lower convolution using  $\mathbf{H}_1$  and  $\mathbf{H}_{1,d}$  on edge  $e_1$ : SCF  $\mathbf{H}_1$  aggregates the information from its direct lower neighbors (edges in blue) and two-hop lower neighbors (edges in purple) to  $e_1$  (in black) if  $T_d = 2$ ; and lower SCF  $\mathbf{H}_{1,d}$  aggregates the projected information from nodes to edges likewise (denoted by the arrows in blue and purple from nodes to edges). (c) Upper convolution via  $\mathbf{H}_1$  and  $\mathbf{H}_{1,u}$  on  $e_1$ :  $\mathbf{H}_1$  aggregates the information from direct upper neighbors (edges in red) and two-hop upper neighbors (edges in orange) to  $e_1$  (in black); and upper SCF  $\mathbf{H}_{1,u}$  aggregates the projected information from triangles to edges likewise (denoted by double arrows in red and orange from triangle centers to edges). (d) Node 1 (in black) contains information from its neighbors  $\{2, 3, 4\}$  (nodes in red), and projected information from edges which contribute to these neighbors (denoted by arrows in red from edges to nodes), and from triangles  $\{t_1, t_2, t_3\}$  which contribute to those edges (denoted by double arrows in red from triangle centers to edges). This interaction is the coupling between the intra- and the extended inter-simplicial locality.

## 631 B.1 Simplicial locality in details

632 The construction of SCFs has an intra-simplicial locality.  $\mathbf{H}_k \mathbf{x}_k$ , which consists of basic operations  
 633  $\mathbf{L}_{k,d} \mathbf{x}_k$  and  $\mathbf{L}_{k,u} \mathbf{x}_k$ . They are given, on simplex  $s_i^k$ , by

$$[\mathbf{L}_{k,d} \mathbf{x}_k]_i = \sum_{j \in \mathcal{N}_{i,d}^k \cup \{i\}} [\mathbf{L}_{k,d}]_{ij} [\mathbf{x}_k]_j, \quad [\mathbf{L}_{k,u} \mathbf{x}_k]_i = \sum_{j \in \mathcal{N}_{i,u}^k \cup \{i\}} [\mathbf{L}_{k,u}]_{ij} [\mathbf{x}_k]_j, \quad (\text{B.3})$$

634 where  $s_i^k$  aggregates signals from its lower and upper neighbors,  $\mathcal{N}_{i,d}^k$  and  $\mathcal{N}_{i,u}^k$ . We can compute  
 635 the  $t$ -step shifting recursively as  $\mathbf{L}_{k,d}^t \mathbf{x}_k = \mathbf{L}_{k,d}(\mathbf{L}_{k,d}^{t-1} \mathbf{x}_k)$ , a one-step shifting of the  $(t-1)$ -shift  
 636 result; likewise for  $\mathbf{L}_{k,u}^t \mathbf{x}_k$ . A SCF linearly combines such multi-step simplicial shiftings based on  
 637 lower and upper adjacencies. Thus, the output  $\mathbf{H}_k \mathbf{x}_k$  is localized in  $T_d$ -hop lower and  $T_u$ -hop upper  
 638  $k$ -simplicial neighborhoods [30]. SCCNNs preserve such *intra-simplicial locality* as the elementwise  
 639 nonlinearity does not alter the information locality, shown in Figs. B.1b and B.1c.

640 A SCCNN takes the data on  $k$ - and  $(k \pm 1)$ -simplices at layer  $l-1$  to compute  $\mathbf{x}_k^l$ , causing interactions  
 641 between  $k$ -simplices and their (co)faces when all SCFs are identity. In turn,  $\mathbf{x}_{k-1}^{l-1}$  contains information  
 642 on  $(k-2)$ -simplices from layer  $l-2$ . Likewise for  $\mathbf{x}_{k+1}^{l-1}$ , thus,  $\mathbf{x}_k^l$  also contains information up to  
 643  $(k \pm 2)$ -simplices if  $L \geq 2$ , because  $\mathbf{B}_k \sigma(\mathbf{B}_{k+1}) \neq \mathbf{0}$ . Accordingly, this *inter-simplicial locality*  
 644 extends to the whole SC if  $L \geq K$ , unlike linear filters in a SC where the locality happens up to the  
 645 adjacent simplices [31, 66], which limits its expressive power. This locality is further coupled with  
 646 the intra-locality through three SCFs such that a node not only interacts with the edges incident to it  
 647 and direct triangles including it, but also edges and triangles further hops away which contribute to  
 648 the neighboring nodes, as shown in Fig. B.1d.

## 649 B.2 Complexity

650 In a SCCNN layer for computing  $\mathbf{x}_k^l$ , there are  $2 + T_d + T_u$  filter coefficients for the SCF  $\mathbf{H}_k^l$ , and  
 651  $1 + T_d$  and  $1 + T_u$  for  $\mathbf{H}_{k,d}^l$  and  $\mathbf{H}_{k,u}^l$ , respectively, which gives the parameter complexity of order  
 652  $\mathcal{O}(T_d + T_u)$ . This complexity will increase by  $F_l F_{l-1}$  fold for the multi-feature case, and likewise  
 653 for the computational complexity. Given the inputs  $\{\mathbf{x}_{k-1}^{l-1}, \mathbf{x}_k^{l-1}, \mathbf{x}_{k+1}^{l-1}\}$ , we discuss the computation  
 654 complexity of  $\mathbf{x}_k^l$  in (I).

655 First, consider the SCF operation  $\mathbf{H}_k^l \mathbf{x}_k^{l-1}$ . As discussed in the localities, it is a composition of  
 656  $T_d$ -step lower and  $T_u$ -step upper simplicial shiftings. Each simplicial shifting has a computational

657 complexity of order  $\mathcal{O}(n_k m_k)$  dependent on the number of neighbors. Thus, this operation has a  
 658 complexity of order  $\mathcal{O}(n_k m_k (T_d + T_u))$ .

659 Second, consider the lower SCF operation  $\mathbf{H}_{k,d}^l \mathbf{B}_k^\top \mathbf{x}_{k-1}^{l-1}$ . As incidence matrix  $\mathbf{B}_k$  is sparse, it has  
 660  $n_k(k+1)$  nonzero entries as each  $k$ -simplex has  $k+1$  faces. This leads to a complexity of order  
 661  $\mathcal{O}(n_k k)$  for operation  $\mathbf{B}_k^\top \mathbf{x}_{k-1}^{l-1}$ . Followed by a lower SCF operation, i.e., a  $T_d$ -step lower simplicial  
 662 shifting, thus, a complexity of order  $\mathcal{O}(k n_k + n_k m_k T_d)$  is needed.

663 Third, consider the upper SCF operation  $\mathbf{H}_{k,u}^l \mathbf{B}_{k+1}^\top \mathbf{x}_{k+1}^{l-1}$ . Likewise, incidence matrix  $\mathbf{B}_{k+1}$  has  
 664  $n_{k+1}(k+2)$  nonzero entries. This leads to a complexity of order  $\mathcal{O}(n_{k+1} k)$  for the projection  
 665 operation  $\mathbf{B}_{k+1}^\top \mathbf{x}_{k+1}^{l-1}$ . Followed by an upper SCF operation, i.e., a  $T_u$ -step upper simplicial shifting,  
 666 thus, a complexity of order  $\mathcal{O}(k n_{k+1} + n_k M_k T_u)$  is needed.

667 Finally, we have a computational complexity of order  $\mathcal{O}(k(n_k + n_{k+1}) + N_k M_k (T_d + T_u))$  in total.

668 *Remark 15.* The lower SCF operation  $\mathbf{H}_{k,d}^l \mathbf{B}_k^\top \mathbf{x}_{k-1}^{l-1}$  can be further reduced if  $n_{k-1} \ll n_k$ . Note  
 669 that we have

$$\mathbf{H}_{k,d}^l \mathbf{B}_k^\top \mathbf{x}_{k-1}^{l-1} = \sum_{t=0}^{T_d} w_{k,d,t}^l \mathbf{L}_{k,d}^t \mathbf{B}_k^\top \mathbf{x}_{k-1}^{l-1} = \mathbf{B}_k^\top \sum_{t=0}^{T_d} w_{k,d,t}^l \mathbf{L}_{k-1,u}^t \mathbf{x}_{k-1}^{l-1}, \quad (\text{B.4})$$

670 where the second equality comes from that  $\mathbf{L}_{k,d} \mathbf{B}_k^\top = \mathbf{B}_k^\top \mathbf{B}_k \mathbf{B}_k^\top = \mathbf{B}_k^\top \mathbf{L}_{k-1,u}$ ,  $\mathbf{L}_{k,d}^2 \mathbf{B}_k^\top =$   
 671  $(\mathbf{B}_k^\top \mathbf{B}_k)(\mathbf{B}_k^\top \mathbf{B}_k) \mathbf{B}_k^\top = \mathbf{B}_k^\top (\mathbf{B}_k \mathbf{B}_k^\top)(\mathbf{B}_k \mathbf{B}_k^\top) = \mathbf{B}_k^\top \mathbf{L}_{k-1,u}$  and likewise for general  $t$ . Using the  
 672 RHS of (B.4) where the simplicial shifting is performed in the  $(k-1)$ -simplicial space, we have a  
 673 complexity of order  $\mathcal{O}(k N_k + n_{k-1} m_{k-1} T_d)$ . Similarly, we have

$$\mathbf{H}_{k,u}^l \mathbf{B}_{k+1}^\top \mathbf{x}_{k+1}^{l-1} = \sum_{t=0}^{T_u} w_{k,u,t}^l \mathbf{L}_{k,u}^t \mathbf{B}_{k+1}^\top \mathbf{x}_{k+1}^{l-1} = \mathbf{B}_{k+1}^\top \sum_{t=0}^{T_u} w_{k,u,t}^l \mathbf{L}_{k+1,d}^t \mathbf{x}_{k+1}^{l-1} \quad (\text{B.5})$$

674 where the simplicial shifting is performed in the  $(k+1)$ -simplicial space. If it follows that  $n_{k+1} \ll n_k$ ,  
 675 we have a smaller complexity of  $\mathcal{O}(k N_{k+1} + n_{k+1} m_{k+1} T_u)$  by using the RHS of (B.5).

### 676 B.3 Details on Symmetries of SCs and simplicial data, Equivariance of SCCNNs

677 **Permutation symmetry of SCs.** There exists a permutation group  $P_{n_k}$  for each set  $\mathcal{S}^k$  in a SC  
 678 of order  $K$ . For  $K = 0$ , this gives the graph permutation group. We can combine these groups for  
 679 different simplex orders by a group product to form a larger permutation group  $P = \times_k P_{n_k}$ , which  
 680 is a symmetry group of SCs and simplicial data, assuming vertices in each simplex are consistently  
 681 ordered. That is, we have, for  $p = (p_0, p_1, \dots, p_K) \in P$ ,  $[p \cdot \mathbf{L}_k]_{ij} = [\mathbf{L}_k]_{p_k^{-1}(i)p_k^{-1}(j)}$ ,  $[p \cdot \mathbf{B}_k]_{ij} =$   
 682  $[\mathbf{B}_k]_{p_{k-1}^{-1}(i)p_{k-1}^{-1}(j)}$ , and  $[p \cdot \mathbf{x}_k]_i = [\mathbf{x}_k]_{p_k^{-1}(i)}$ . This permutation symmetry of SCs gives us the freedom  
 683 to list simplices in any order.

684 **Orientation symmetry of simplicial data.** The orientation of a simplex is an equivalence class  
 685 that two orientations are equivalent if they differ by an even permutation [9, 8]. Thus, for a simplex  
 686  $s_i^k = \{i_0, \dots, i_k\}$  with  $k > 0$ , we have an *orientation symmetry* group  $O_{k,i} = \{o_{k,i}^+, o_{k,i}^-\}$  by a group  
 687 homomorphism which maps all the even permutations of  $\{i_0, \dots, i_k\}$  to the identity element  $o_{k,i}^+$   
 688 and all the odd permutations to the reverse operation  $o_{k,i}^-$ .

689 We can further combine the orientation groups of all simplices in a SC as  $O = \times_{i,k} O_{k,i}$  by using a  
 690 group product. This however is not a symmetry group of an oriented SC because  $o_{k,i}^- \cdot \mathbf{L}_k$  changes the  
 691 signs of  $\mathbf{L}_k$  elements in  $i$ th column and row, and  $o_{k,i}^- \cdot \mathbf{B}_k$  changes the  $i$ th row, resulting in a different  
 692 SC topology. Instead, it is a symmetry group of the data space, due to its alternating nature w.r.t.  
 693 simplices. For  $o \in O$  we have  $[o \cdot \mathbf{x}_k]_i = o_{k,i} \cdot f_k(s_i^k) = f_k(o_{k,i}^{-1} \cdot s_i^k)$ , i.e.,  $[\mathbf{x}_k]_i$  remains unchanged  
 694 w.r.t. the changed orientation of  $s_i^k$ . This gives us the freedom to choose reference orientations of  
 695 simplices when working with simplicial data.

696 **Theorem 16** (Permutation Equivariance). A SCCNN in Eq. (1) is  $P$ -equivariant. For all  $p \in P$ , we  
 697 have  $p \cdot \text{SCCNN}_k : \{p_{k-1} \cdot \mathbf{x}_{k-1}, p_k \cdot \mathbf{x}_k, p_{k+1} \cdot \mathbf{x}_{k+1}\} \rightarrow p_k \mathbf{x}_k$ .

698 **Theorem 17** (Orientation Equivariance). A SCCNN in Eq. (1) is  $O$ -equivariant if  $\sigma(\cdot)$  is odd. For all  
 699  $o \in O$ , we have  $o \cdot \text{SCCNN}_k : \{o_{k-1} \cdot \mathbf{x}_{k-1}, o_k \cdot \mathbf{x}_k, o_{k+1} \cdot \mathbf{x}_{k+1}\} \rightarrow o_k \cdot \mathbf{x}_k$ .

700 *Proof.* Both the permutation group and orientation group have linear matrix representations. By  
 701 following the same procedure in [17, Appendix D] or [16], we can prove the equivariance.  $\square$

## 702 B.4 Diffusion process on SCs

703 Diffusion process on graphs can be generalized to SCs to characterize the evolution of simplicial  
 704 data over the SC, in analogy to data diffusion on nodes [12, 36, 29]. Here we provide an informal  
 705 treatment of how discretizing diffusion equations on SCs can give resemblances of simplicial shifting  
 706 layers. Consider diffusion equation and its Euler discretization with a unit time step

$$\dot{\mathbf{x}}_k(t) = -\mathbf{L}_k \mathbf{x}_k(t), \text{ Euler step: } \mathbf{x}_k(t+1) = \mathbf{x}_k(t) - \mathbf{L}_k \mathbf{x}_k(t) = (\mathbf{I} - \mathbf{L}_k) \mathbf{x}_k(t) \quad (\text{B.6})$$

707 with an initial condition  $\mathbf{x}_k(t) = \mathbf{x}_k^0$ . The solution of this diffusion is  $\mathbf{x}_k(t) = \exp(-\mathbf{L}_k t) \mathbf{x}_k^0$ . As  
 708 the time increases, the simplicial data reaches to a steady state  $\dot{\mathbf{x}}_k(t) = \mathbf{0}$ , which lies in the harmonic  
 709 space  $\ker(\mathbf{L}_k)$ . The simplicial shifting layer resembles this Euler step with a weight and nonlinearity  
 710 when viewing the time step as layer index. Thus, a NN composed of simplicial shifting layers can  
 711 suffer from oversmoothing on SCs, giving outputs with decreasing Dirichlet energies as the number  
 712 of layers increases.

713 Now let us consider the case where the two Laplacians have different coefficients

$$\dot{\mathbf{x}}_k(t) = -\mathbf{L}_{k,d} \mathbf{x}_k(t) - \gamma \mathbf{L}_{k,u} \mathbf{x}_k(t), \text{ Euler step: } \mathbf{x}_k(t) = (\mathbf{I} - \mathbf{L}_{k,d} - \gamma \mathbf{L}_{k,u}) \mathbf{x}_k(t). \quad (\text{B.7})$$

714 The steady state of this diffusion equation follows  $(\mathbf{L}_{k,d} + \gamma \mathbf{L}_{k,u}) \mathbf{x}_k(t) = \mathbf{0}$ , where  $\mathbf{x}_k(t)$  would be  
 715 in the kernel space of  $\mathbf{L}_k$  still. However, before reaching this state, when the time increases,  $\mathbf{x}_k(t)$   
 716 would primarily approach to the kernel of  $\mathbf{B}_{k+1}^\top$  if  $\gamma \gg 1$ , in which the lower part of the Dirichlet  
 717 energy remains, i.e., the decrease of  $D(\mathbf{x}(t))$  slows down.

718 When accounting for inter-simplicial couplings, consider there are nontrivial  $\mathbf{x}_{k-1}$  and  $\mathbf{x}_{k+1}$  and the  
 719 diffusion equation becomes

$$\dot{\mathbf{x}}_k(t) = -\mathbf{L}_k \mathbf{x}_k(t) + \mathbf{B}_k^\top \mathbf{x}_{k-1} + \mathbf{B}_{k+1} \mathbf{x}_{k+1}, \quad (\text{B.8})$$

720 which has source terms  $\mathbf{B}_k^\top \mathbf{x}_{k-1} + \mathbf{B}_{k+1} \mathbf{x}_{k+1}$ . Consider a steady state  $\dot{\mathbf{x}}_k = 0$ . We have  $\mathbf{L}_k \mathbf{x}_k(t) =$   
 721  $\mathbf{x}_{k,d} + \mathbf{x}_{k,u}$ , where  $\mathbf{x}_k$  is not in the kernel space of  $\mathbf{L}_k$ . The Euler discretization gives

$$\mathbf{x}_k(t+1) = (\mathbf{I} - \mathbf{L}_k) \mathbf{x}_k(t) + \mathbf{x}_{k,d} + \mathbf{x}_{k,u}. \quad (\text{B.9})$$

722 The layer in [14]  $\mathbf{x}_k^{l+1} = w_0(\mathbf{I} - \mathbf{L}_k) \mathbf{x}_k^l + w_1 \mathbf{x}_{k,d} + w_2 \mathbf{x}_{k,u}$  is a weighted variant of above step  
 723 when viewing time steps as layers.

## 724 C Proofs for Section 3

### 725 C.1 Dirichlet energy minimization perspective

726 **Hodge Laplacian smoothing.** We can find the gradient of problem Eq. (2) as  $\frac{\partial D}{\partial \mathbf{x}_k} = \mathbf{B}_k^\top \mathbf{B}_k \mathbf{x}_k +$   
 727  $\gamma \mathbf{B}_{k+1} \mathbf{B}_{k+1}^\top \mathbf{x}_k$ , thus, a gradient descent step follows as Eq. (2) with a step size  $\eta$ .

728 *Proof of Proposition 3.* Consider  $\eta = 1$ .

$$\begin{aligned} D(\mathbf{x}_k^{l+1}) &= w_0^2 \|\mathbf{B}_k(\mathbf{I} - \mathbf{L}_{k,d} - \gamma \mathbf{L}_{k,u}) \mathbf{x}_k^l\|_2^2 + w_0^2 \|\mathbf{B}_{k+1}^\top (\mathbf{I} - \mathbf{L}_{k,d} - \gamma \mathbf{L}_{k,u}) \mathbf{x}_k^l\|_2^2 \\ &= w_0^2 \|(\mathbf{I} - \mathbf{L}_{k-1,u}) \mathbf{B}_k \mathbf{x}_k^l\|_2^2 + w_0^2 \|(\mathbf{I} - \gamma \mathbf{L}_{k+1,d}) \mathbf{B}_{k+1}^\top \mathbf{x}_k^l\|_2^2 \\ &\leq w_0^2 \|(\mathbf{I} - \mathbf{L}_{k-1,u})\|_2^2 \|\mathbf{B}_k \mathbf{x}_k^l\|_2^2 + w_0^2 \|(\mathbf{I} - \gamma \mathbf{L}_{k+1,d})\|_2^2 \|\mathbf{B}_{k+1}^\top \mathbf{x}_k^l\|_2^2 \end{aligned} \quad (\text{C.1})$$

729 which follows from triangle inequality. By definition, we have  $\|\mathbf{I} - \mathbf{L}_{k-1,u}\|_2^2 = \|\mathbf{I} - \mathbf{L}_{k,d}\|_2^2$  and  
 730  $\|\mathbf{I} - \mathbf{L}_{k,u}\|_2^2 = \|\mathbf{I} - \mathbf{L}_{k+1,d}\|_2^2$ . Also, we have  $\|\mathbf{I} - \mathbf{L}_k\|_2^2 = \max\{\|\mathbf{I} - \mathbf{L}_{k,d}\|_2^2, \|\mathbf{I} - \mathbf{L}_{k,u}\|_2^2\}$ . Thus,  
 731 we have  $D(\mathbf{x}_k^{l+1}) \leq w_0^2 \|\mathbf{I} - \mathbf{L}_k\|_2^2 D(\mathbf{x}_k^l)$  when  $\gamma = 1$ . When  $w_0^2 \|\mathbf{I} - \mathbf{L}_k\|_2^2 < 1$ , Dirichlet energy  
 732  $D(\mathbf{x}_k^{l+1})$  will exponentially decrease as  $l$  increases.  $\square$

733 When  $\gamma \neq 1$ , from (C.1), we have  $D(\mathbf{x}_k^{l+1}) = D_d(\mathbf{x}_k^{l+1}) + D_u(\mathbf{x}_k^{l+1})$ , which follows

$$D_d(\mathbf{x}_k^{l+1}) \leq w_0^2 \|(\mathbf{I} - \mathbf{L}_{k,d})\|_2^2 D_d(\mathbf{x}_k^l) \text{ and } D_u(\mathbf{x}_k^{l+1}) \leq w_0^2 \|(\mathbf{I} - \gamma \mathbf{L}_{k,u})\|_2^2 D_u(\mathbf{x}_k^l) \quad (\text{C.2})$$

When  $\gamma = 1$ , the oversmoothing condition is  $\|\mathbf{I} - \mathbf{L}_k\|_2^2 = \max\{\|\mathbf{I} - \mathbf{L}_{k,d}\|_2^2, \|\mathbf{I} - \mathbf{L}_{k,u}\|_2^2\} < \frac{1}{w_0^2}$ .  
 If  $\|\mathbf{I} - \mathbf{L}_k\|_2^2 = \|\mathbf{I} - \mathbf{L}_{k,d}\|_2^2$ , under the oversmoothing condition, by not restricting  $\gamma$  to be 1,  
 $w_0^2\|(\mathbf{I} - \gamma\mathbf{L}_{k,u})\|_2^2$  can be larger than 1 depending on the choice, which means  $D_u(\mathbf{x}_k^l)$  does not  
 necessarily decrease, so does not  $D(\mathbf{x}_k^l)$ .

**Hodge Laplacian smoothing with sources.** The gradient of the objective in Eq. (3) is given by  
 $\mathbf{L}_k \mathbf{x}_k^l - \mathbf{B}_k^\top \mathbf{x}_{k-1} - \mathbf{B}_{k+1} \mathbf{x}_{k+1}$ , which gives the gradient descent update in Eq. (3) with a step size  $\eta$ .  
 Consider the layer in [14]  $\mathbf{x}_k^{l+1} = w_0(\mathbf{I} - \mathbf{L}_k)\mathbf{x}_k^l + w_1\mathbf{x}_{k,d} + w_2\mathbf{x}_{k,u}$  with some weights. By triangle in-  
 equality, we have  $D(\mathbf{x}_k^{l+1}) \leq w_0^2\|\mathbf{I} - \mathbf{L}_k\|_2^2 D(\mathbf{x}_k^l) + w_1^2\lambda_{\max}(\mathbf{L}_{k,d})\|\mathbf{x}_{k,d}\|_2^2 + w_2^2\lambda_{\max}(\mathbf{L}_{k,u})\|\mathbf{x}_{k,u}\|_2^2$ .  
 If the weight  $w_0$  is small enough following the condition in Proposition 3, the contribution from the  
 projections, controlled by weights  $w_1$  and  $w_2$ , can compromise the decrease by  $w_0$ , maintaining the  
 Dirichlet energy.

## D Proofs for Section 4

### D.1 A derivation of the spectral frequency response Eq. (4)

**SFT of  $\mathbf{x}_k$ .** First, the SFT of  $\mathbf{x}_k$  is given by  $\tilde{\mathbf{x}}_k = [\tilde{\mathbf{x}}_{k,H}^\top, \tilde{\mathbf{x}}_{k,G}^\top, \tilde{\mathbf{x}}_{k,C}^\top]^\top$  with the *harmonic embedding*  
 $\tilde{\mathbf{x}}_{k,H} = \mathbf{U}_{k,H}^\top \mathbf{x}_k = \mathbf{U}_{k,H}^\top \mathbf{x}_{k,H}$  in the zero frequencies, the *gradient embedding*  $\tilde{\mathbf{x}}_{k,G} = \mathbf{U}_{k,G}^\top \mathbf{x}_k =$   
 $\mathbf{U}_{k,G}^\top \mathbf{x}_{k,G}$  in the gradient frequencies, and the *curl embedding*  $\tilde{\mathbf{x}}_{k,C} = \mathbf{U}_{k,C}^\top \mathbf{x}_k = \mathbf{U}_{k,C}^\top \mathbf{x}_{k,C}$  in the  
 curl frequencies.

**SFT of  $\mathbf{H}_k \mathbf{x}_k$ .** By diagonalizing an SCF  $\mathbf{H}_k$  with  $\mathbf{U}_k$ , we have

$$\mathbf{H}_k \mathbf{x}_k = \mathbf{U}_k \tilde{\mathbf{H}}_k \mathbf{U}_k^\top \mathbf{x}_k = \mathbf{U}_k (\tilde{\mathbf{h}}_k \odot \tilde{\mathbf{x}}_k) \quad (\text{D.1})$$

where  $\tilde{\mathbf{H}}_k = \text{diag}(\tilde{\mathbf{h}}_k)$ . Here,  $\tilde{\mathbf{h}}_k = [\tilde{\mathbf{h}}_{k,H}^\top, \tilde{\mathbf{h}}_{k,G}^\top, \tilde{\mathbf{h}}_{k,C}^\top]^\top$  is the *frequency response*, given by

$$\begin{cases} \text{harmonic response : } \tilde{\mathbf{h}}_{k,H} = (w_{k,d,0} + w_{k,u,0})\mathbf{1}, \\ \text{gradient response : } \tilde{\mathbf{h}}_{k,G} = \sum_{t=0}^{T_d} w_{k,d,t} \boldsymbol{\lambda}_{k,G}^{\odot t} + w_{k,u,0}\mathbf{1}, \\ \text{curl response : } \tilde{\mathbf{h}}_{k,C} = \sum_{t=0}^{T_u} w_{k,u,t} \boldsymbol{\lambda}_{k,C}^{\odot t} + w_{k,d,0}\mathbf{1}, \end{cases}$$

with  $(\cdot)^{\odot t}$  the elementwise  $t$ th power of a vector. Thus, we can express  $\tilde{\mathbf{h}}_k \odot \tilde{\mathbf{x}}_k$  as

$$[(\tilde{\mathbf{h}}_{k,H} \odot \tilde{\mathbf{x}}_{k,H})^\top, (\tilde{\mathbf{h}}_{k,G} \odot \tilde{\mathbf{x}}_{k,G})^\top, (\tilde{\mathbf{h}}_{k,C} \odot \tilde{\mathbf{x}}_{k,C})^\top]^\top. \quad (\text{D.2})$$

**SFT of projections.** Second, the lower projection  $\mathbf{x}_{k,d} \in \text{im}(\mathbf{B}_k^\top)$  has only a nonzero gradient  
 embedding  $\tilde{\mathbf{x}}_{k,d} = \mathbf{U}_{k,G}^\top \mathbf{x}_{k,d}$ . Likewise, the upper projection  $\mathbf{x}_{k,u} \in \text{im}(\mathbf{B}_{k+1})$  contains only a  
 nonzero curl embedding  $\tilde{\mathbf{x}}_{k,u} = \mathbf{U}_{k,C}^\top \mathbf{x}_{k,u}$ . The lower SCF  $\mathbf{H}_{k,d}$  has  $\tilde{\mathbf{h}}_{k,d} = \sum_{t=0}^{T_d} w'_{k,d,t} \boldsymbol{\lambda}_{k,G}^{\odot t}$  as  
 the frequency response that modulates the gradient embedding of  $\mathbf{x}_{k,d}$  and the upper SCF  $\mathbf{H}_{k,u}$  has  
 $\tilde{\mathbf{h}}_{k,u} = \sum_{t=0}^{T_u} w'_{k,u,t} \boldsymbol{\lambda}_{k,C}^{\odot t}$  as the frequency response that modulates the curl embedding of  $\mathbf{x}_{k,u}$ .

**SFT of  $\mathbf{y}_k$ .** For the output  $\mathbf{y}_k = \mathbf{H}_{k,d}\mathbf{x}_{k,d} + \mathbf{H}_k\mathbf{x}_k + \mathbf{H}_{k,u}\mathbf{x}_{k,u}$ , we have

$$\begin{cases} \tilde{\mathbf{y}}_{k,H} = \tilde{\mathbf{h}}_{k,H} \odot \tilde{\mathbf{x}}_{k,H}, \\ \tilde{\mathbf{y}}_{k,G} = \tilde{\mathbf{h}}_{k,d} \odot \tilde{\mathbf{x}}_{k,d} + \tilde{\mathbf{h}}_{k,G} \odot \tilde{\mathbf{x}}_{k,G}, \\ \tilde{\mathbf{y}}_{k,C} = \tilde{\mathbf{h}}_{k,C} \odot \tilde{\mathbf{x}}_{k,C} + \tilde{\mathbf{h}}_{k,u} \odot \tilde{\mathbf{x}}_{k,u}. \end{cases} \quad (\text{D.3})$$

### D.2 Expressive power in Theorem 6

*Proof.* From the Cayley-Hamilton theorem [37], we know that an analytical function  $f(\mathbf{A})$  of a  
 matrix  $\mathbf{A}$  can be expressed as a matrix polynomial of degree at most its minimal polynomial degree,  
 which equals to the number of distinct eigenvalues if  $\mathbf{A}$  is positive semi-definite.

Consider an analytical function  $\mathbf{G}_{k,d}$  of  $\mathbf{L}_{k,d}$ , defined on the spectrum of  $\mathbf{L}_{k,d}$  via analytical function  
 $g_{k,G}(\lambda)$  where  $\lambda$  is in the set of zero and the gradient frequencies. Then,  $\mathbf{G}_{k,d}$  can be implemented  
 by a matrix polynomial of  $\mathbf{L}_{k,d}$  of order up to  $n_{k,G}$  where  $n_{k,G}$  is the number of nonzero eigenvalues



of  $\mathbf{L}_{k,d}$ , i.e., the number of distinct gradient frequencies. Likewise, any analytical function  $\mathbf{G}_{k,u}$  of  $\mathbf{L}_{k,u}$  can be implemented by a matrix polynomial of  $\mathbf{L}_{k,u}$  of order up to  $n_{k,C}$ , which is the number of nonzero eigenvalues of  $\mathbf{L}_{k,u}$ , i.e., the number of distinct curl frequencies.

Thus, as of the matrix polynomial definition of SCFs in a SCCNN, the expressive power of  $\mathbf{H}_{k,d}\mathbf{x}_{k,d} + \mathbf{H}_{k,u}\mathbf{x}_{k,u}$  is at most  $\mathbf{G}'_{k,d}\mathbf{x}_{k,d} + (\mathbf{G}_{k,d} + \mathbf{G}_{k,u})\mathbf{x}_k + \mathbf{G}'_{k,u}\mathbf{x}_{k,u}$ , when the matrix polynomial orders (convolution orders) follow  $T_{k,d} = T'_{k,d} = n_{k,G}$  and  $T_{k,u} = T'_{k,u} = n_{k,C}$ .  $\square$

### D.3 Hodge-aware of SCCNN in Theorem 7

*Proof.* Consider a linear mapping  $T : V \rightarrow V$ . An invariant subspace  $W$  of  $T$  has the property that all vectors  $\mathbf{v} \in W$  are transformed by  $T$  into vectors also contained in  $W$ , i.e.,  $\mathbf{v} \in W \implies T(\mathbf{v}) \in W$ . For an input  $\mathbf{x} \in \text{im}(\mathbf{B}_k^\top)$ , the output  $\mathbf{H}_k\mathbf{x}$  is in  $\text{im}(\mathbf{B}_k^\top)$  too, because of

$$\mathbf{H}_k\mathbf{x} = \sum_t \mathbf{L}_{k,d}^t \mathbf{x} + \sum_t \mathbf{L}_{k,u}^t \mathbf{x} = \sum_t \mathbf{L}_{k,d}^t \mathbf{x} \in \text{im}(\mathbf{B}_k^\top) \quad (\text{D.4})$$

where the second equality comes from the orthogonality between  $\text{im}(\mathbf{B}_k^\top)$  and  $\text{im}(\mathbf{B}_{k+1})$ . Similarly, we can show that for  $\mathbf{x} \in \text{im}(\mathbf{B}_{k+1})$ , the output  $\mathbf{H}_k\mathbf{x} \in \text{im}(\mathbf{B}_{k+1})$ ; for  $\mathbf{x} \in \ker(\mathbf{L}_k)$ , the output  $\mathbf{H}_k\mathbf{x} \in \ker(\mathbf{L}_k)$ . This essentially says the three subspaces of the Hodge decomposition are invariant with respect to the SCF  $\mathbf{H}_k$ . Likewise, the gradient space is invariant with respect to the lower SCF  $\mathbf{H}_{k,d}$ , which says any lower projection remains in the gradient space after passed by  $\mathbf{H}_{k,d}$ ; and the curl space is invariant with respect to the upper SCF  $\mathbf{H}_{k,u}$ .

Lastly, through the spectral relation in Eq. (4) the learning operator  $\mathbf{H}_k$  in the gradient space is controlled by the learnable weights  $\{w_{k,d,t}\}$ , which is independent of the learnable weights  $\{w_{k,u,t}\}$ , associated to the learning of  $\mathbf{H}_k$  in the curl space. Likewise, the lower SCF learns in the gradient space as well but with another set of learnable weights  $\{w'_{k,d,t}\}$ , and the upper SCF learns in the curl space with learnable weights  $\{w'_{k,u,t}\}$ . From the spectral expressive power, we see that above four independent learning in the two subspaces can be as expressive as any analytical functions of the corresponding frequencies (spectrum). This concludes the independent and expressive learning in the gradient and curl spaces.  $\square$

## E Proofs for Section 5

We first give the formulation of SCCNNs on weighted SCs, then we proceed the stability proof.

A weighted SC can be defined through specifying the weights of simplices. We give the definition of a commonly used weighted SC with weighted Hodge Laplacians in [29, 39].

**Definition 18** (Weighted SC and Hodge Laplacians). In an oriented and weighted SC, we have diagonal weighting matrices  $\mathbf{M}_k$  with  $[\mathbf{M}]_{ii}$  measuring the weight of  $i$ th  $k$ -simplex. A weighted  $k$ th Hodge Laplacian is given by

$$\mathbf{L}_k = \mathbf{L}_{k,d} + \mathbf{L}_{k,u} = \mathbf{M}_k \mathbf{B}_k^\top \mathbf{M}_{k-1}^{-1} \mathbf{B}_k + \mathbf{B}_{k+1} \mathbf{M}_{k+1} \mathbf{B}_{k+1}^\top \mathbf{M}_k^{-1}. \quad (\text{E.1})$$

where  $\mathbf{L}_{k,d}$  and  $\mathbf{L}_{k,u}$  are the weighted lower and upper Laplacians. A symmetric version follows  $\mathbf{L}_k^s = \mathbf{M}_k^{-1/2} \mathbf{L}_k \mathbf{M}_k^{1/2}$ , and likewise, we have  $\mathbf{L}_{k,d}^s = \mathbf{M}_k^{1/2} \mathbf{B}_k^\top \mathbf{M}_{k-1}^{-1} \mathbf{B}_k \mathbf{M}_k^{1/2}$  and  $\mathbf{L}_{k,u}^s = \mathbf{M}_k^{-1/2} \mathbf{B}_{k+1} \mathbf{M}_{k+1} \mathbf{B}_{k+1}^\top \mathbf{M}_k^{-1/2}$ , with the weighted incidence matrix is  $\mathbf{M}_{k-1}^{-1/2} \mathbf{B}_k \mathbf{M}_k^{1/2}$  [39, 41].

**SCNNs in weighted SC.** The SCCNN layer defined in a weighted SC is of form

$$\mathbf{x}_k^l = \sigma(\mathbf{H}_{k,d}^l \mathbf{R}_{k,d} \mathbf{x}_{k-1}^{l-1} + \mathbf{H}_k^l \mathbf{x}_k^{l-1} + \mathbf{H}_{k,u}^l \mathbf{R}_{k,u} \mathbf{x}_{k+1}^{l-1}) \quad (\text{E.2})$$

where the three SCFs are defined based on the weighted Laplacians (E.1), and the lower and upper contributions  $\mathbf{x}_{k,d}^l$  and  $\mathbf{x}_{k,u}^l$  are obtained via projection matrices  $\mathbf{R}_{k,d} \in \mathbb{R}^{n_k \times n_{k-1}}$  and  $\mathbf{R}_{k,u} \in \mathbb{R}^{n_k \times n_{k+1}}$ , instead of  $\mathbf{B}_k^\top$  and  $\mathbf{B}_{k+1}$ . For example, [14] considered  $\mathbf{R}_{1,d} = \mathbf{M}_1 \mathbf{B}_1^\top \mathbf{M}_0^{-1}$  and  $\mathbf{R}_{1,u} = \mathbf{B}_2 \mathbf{M}_2$ .

## 806 E.1 Proof of Stability of SCCNNs in Theorem 12

807 For a SCCNN in E.2 in a weighted SC  $\mathcal{S}$ , we consider its perturbed version in a perturbed SC  $\hat{\mathcal{S}}$  at  
808 layer  $l$ , given by

$$\hat{\mathbf{x}}_k^l = \sigma(\hat{\mathbf{H}}_{k,d}^l \hat{\mathbf{R}}_{k,d} \hat{\mathbf{x}}_{k-1}^{l-1} + \hat{\mathbf{H}}_k^l \hat{\mathbf{x}}_k^{l-1} + \hat{\mathbf{H}}_{k,u}^l \hat{\mathbf{R}}_{k,u} \hat{\mathbf{x}}_{k+1}^{l-1}) \quad (\text{E.3})$$

809 which is defined based on perturbed Laplacians with the same set of filter coefficients, and the  
810 perturbed projection operators following relative perturbation model.

811 Given the initial input  $\mathbf{x}_k^0$  for  $k = 0, 1, \dots, K$ , our goal is to upper bound the Euclidean distance  
812 between the outputs  $\mathbf{x}_k^l$  and  $\hat{\mathbf{x}}_k^l$  for  $l = 1, \dots, L$ ,

$$\begin{aligned} \|\hat{\mathbf{x}}_k^l - \mathbf{x}_k^l\|_2 &= \|\sigma(\hat{\mathbf{H}}_{k,d}^l \hat{\mathbf{R}}_{k,d} \hat{\mathbf{x}}_{k-1}^{l-1} - \mathbf{H}_{k,d}^l \mathbf{R}_{k,d} \mathbf{x}_{k-1}^{l-1} \\ &\quad + \hat{\mathbf{H}}_k^l \hat{\mathbf{x}}_k^{l-1} - \mathbf{H}_k^l \mathbf{x}_k^{l-1} + \hat{\mathbf{H}}_{k,u}^l \hat{\mathbf{R}}_{k,u} \hat{\mathbf{x}}_{k+1}^{l-1} - \mathbf{H}_{k,u}^l \mathbf{R}_{k,u} \mathbf{x}_{k+1}^{l-1})\|_2. \end{aligned} \quad (\text{E.4})$$

813 We proceed the proof in two steps: first, we analyze the operator norm  $\|\hat{\mathbf{H}}_k^l - \mathbf{H}_k^l\|_2$  of a SCF  $\mathbf{H}_k^l$   
814 and its perturbed version  $\hat{\mathbf{H}}_k^l$ ; then we look for the bound of the output distance for a general  $L$ -layer  
815 SCCNN. To ease notations, we omit the subscript such that  $\|\mathbf{A}\| = \max_{\|\mathbf{x}\|_2=1} \|\mathbf{A}\mathbf{x}\|_2$  is the operator  
816 norm (spectral radius) of a matrix  $\mathbf{A}$ , and  $\|\mathbf{x}\|$  is the Euclidean norm of a vector  $\mathbf{x}$ .

817 In the first step we omit the indices  $k$  and  $l$  for simplicity since they hold for general  $k$  and  $l$ . We first  
818 give a useful lemma.

819 **Lemma 19.** *Given the  $i$ th eigenvector  $\mathbf{u}_i$  of  $\mathbf{L} = \mathbf{U}\mathbf{A}\mathbf{U}^\top$ , for lower and upper perturbations  $\mathbf{E}_d$   
820 and  $\mathbf{E}_u$ , we have*

$$\mathbf{E}_d \mathbf{u}_i = q_{di} \mathbf{u}_i + \mathbf{E}_1 \mathbf{u}_i, \quad \mathbf{E}_u \mathbf{u}_i = q_{ui} \mathbf{u}_i + \mathbf{E}_2 \mathbf{u}_i \quad (\text{E.5})$$

821 with eigendecompositions  $\mathbf{E}_d = \mathbf{V}_d \mathbf{Q}_d \mathbf{V}_d^\top$  and  $\mathbf{E}_u = \mathbf{V}_u \mathbf{Q}_u \mathbf{V}_u^\top$  where  $\mathbf{V}_d, \mathbf{V}_u$  collect the  
822 eigenvectors and  $\mathbf{Q}_d, \mathbf{Q}_u$  the eigenvalues. It holds that  $\|\mathbf{E}_1\| \leq \epsilon_d \delta_d$  and  $\|\mathbf{E}_2\| \leq \epsilon_u \delta_u$ , with  
823  $\delta_d = (\|\mathbf{V}_d - \mathbf{U}\| + 1)^2 - 1$  and  $\delta_u = (\|\mathbf{V}_u - \mathbf{U}\| + 1)^2 - 1$  measuring the eigenvector misalignments.

824 *Proof.* We first prove that  $\mathbf{E}_d \mathbf{u}_i = q_{di} \mathbf{u}_i + \mathbf{E}_1 \mathbf{u}_i$ . The perturbation matrix on the lower Laplacian  
825 can be written as  $\mathbf{E}_d = \mathbf{E}'_d + \mathbf{E}_1$  with  $\mathbf{E}'_d = \mathbf{U} \mathbf{Q}_d \mathbf{U}^\top$  and  $\mathbf{E}_1 = (\mathbf{V}_d - \mathbf{U}) \mathbf{Q}_d (\mathbf{V}_d - \mathbf{U})^\top +$   
826  $\mathbf{U} \mathbf{Q}_d (\mathbf{V}_d - \mathbf{U})^\top + (\mathbf{V}_d - \mathbf{U}) \mathbf{Q}_d \mathbf{U}^\top$ . For the  $i$ th eigenvector  $\mathbf{u}_i$ , we have that

$$\mathbf{E}_d \mathbf{u}_i = \mathbf{E}'_d \mathbf{u}_i + \mathbf{E}_1 \mathbf{u}_i = q_{di} \mathbf{u}_i + \mathbf{E}_1 \mathbf{u}_i \quad (\text{E.6})$$

827 where the second equality follows from  $\mathbf{E}'_d \mathbf{u}_i = q_{di} \mathbf{u}_i$ . Since  $\|\mathbf{E}_d\| \leq \epsilon_d$ , it follows that  $\|\mathbf{Q}_d\| \leq \epsilon_d$ .  
828 Then, applying the triangle inequality, we have that

$$\begin{aligned} \|\mathbf{E}_1\| &\leq \|(\mathbf{V}_d - \mathbf{U}) \mathbf{Q}_d (\mathbf{V}_d - \mathbf{U})^\top\| + \|\mathbf{U} \mathbf{Q}_d (\mathbf{V}_d - \mathbf{U})^\top\| + \|(\mathbf{V}_d - \mathbf{U}) \mathbf{Q}_d \mathbf{U}\| \\ &\leq \|\mathbf{V}_d - \mathbf{U}\|^2 \|\mathbf{Q}_d\| + 2\|\mathbf{V}_d - \mathbf{U}\| \|\mathbf{Q}_d\| \|\mathbf{U}\| \leq \epsilon_d \|\mathbf{V}_d - \mathbf{U}\|^2 + 2\epsilon_d \|\mathbf{V}_d - \mathbf{U}\| \\ &= \epsilon_d ((\|\mathbf{V}_d - \mathbf{U}\| + 1)^2 - 1) = \epsilon_d \delta_d, \end{aligned} \quad (\text{E.7})$$

829 which completes the proof for the lower perturbation matrix. Likewise, we can prove for  $\mathbf{E}_u \mathbf{u}_i$ .  $\square$

### 830 E.1.1 Step I: Stability of the SCF $\mathbf{H}_k^l$

831 *Proof. 1. Low-order approximation of  $\hat{\mathbf{H}} - \mathbf{H}$ .* Given a SCF  $\mathbf{H} = \sum_{t=0}^{T_d} w_{d,t} \mathbf{L}_d^t + \sum_{t=0}^{T_u} w_{u,t} \mathbf{L}_u^t$ ,  
832 we denote its perturbed version by  $\hat{\mathbf{H}} = \sum_{t=0}^{T_d} w_{d,t} \hat{\mathbf{L}}_d^t + \sum_{t=0}^{T_u} w_{u,t} \hat{\mathbf{L}}_u^t$ , where the filter coefficients  
833 are the same. The difference between  $\mathbf{H}$  and  $\hat{\mathbf{H}}$  can be expressed as

$$\hat{\mathbf{H}} - \mathbf{H} = \sum_{t=0}^{T_d} w_{d,t} (\hat{\mathbf{L}}_d^t - \mathbf{L}_d^t) + \sum_{t=0}^{T_u} w_{u,t} (\hat{\mathbf{L}}_u^t - \mathbf{L}_u^t), \quad (\text{E.8})$$

834 in which we can compute the first-order Taylor expansion of  $\hat{\mathbf{L}}_d^t$  as

$$\hat{\mathbf{L}}_d^t = (\mathbf{L}_d + \mathbf{E}_d \mathbf{L}_d + \mathbf{L}_d \mathbf{E}_d)^t = \mathbf{L}_d^t + \mathbf{D}_{d,t} + \mathbf{C}_d \quad (\text{E.9})$$



with  $\mathbf{D}_{d,t} := \sum_{r=0}^{t-1} (\mathbf{L}_d^r \mathbf{E}_d \mathbf{L}_d^{t-r} + \mathbf{L}_d^{r+1} \mathbf{E}_d \mathbf{L}_d^{t-r-1})$  parameterized by  $t$  and  $\mathbf{C}_d$  following  $\|\mathbf{C}_d\| \leq \sum_{r=2}^t \binom{t}{r} \|\mathbf{E}_d \mathbf{L}_d + \mathbf{L}_d \mathbf{E}_d\|^r \|\mathbf{L}_d\|^{t-r}$ . Likewise, we can expand  $\hat{\mathbf{L}}_u^t$  as

$$\hat{\mathbf{L}}_u^t = (\mathbf{L}_u + \mathbf{E}_u \mathbf{L}_d + \mathbf{L}_d \mathbf{u})^t = \mathbf{L}_u^t + \mathbf{D}_{u,t} + \mathbf{C}_u \quad (\text{E.10})$$

with  $\mathbf{D}_{u,t} := \sum_{r=0}^{t-1} (\mathbf{L}_u^r \mathbf{E}_u \mathbf{L}_u^{t-r} + \mathbf{L}_u^{r+1} \mathbf{E}_u \mathbf{L}_u^{t-r-1})$  parameterized by  $t$  and  $\mathbf{C}_u$  following  $\|\mathbf{C}_u\| \leq \sum_{r=2}^t \binom{t}{r} \|\mathbf{E}_u \mathbf{L}_u + \mathbf{L}_u \mathbf{E}_u\|^r \|\mathbf{L}_u\|^{t-r}$ . Then, by substituting (E.9) and (E.10) into (E.8), we have

$$\hat{\mathbf{H}} - \mathbf{H} = \sum_{t=0}^{T_d} w_{d,t} \mathbf{D}_{d,t} + \sum_{t=0}^{T_u} w_{u,t} \mathbf{D}_{u,t} + \mathbf{F}_d + \mathbf{F}_u \quad (\text{E.11})$$

with negligible terms  $\|\mathbf{F}_d\| = \mathcal{O}(\|\mathbf{E}_d\|^2)$  and  $\|\mathbf{F}_u\| = \mathcal{O}(\|\mathbf{E}_u\|^2)$  because perturbations are small and the coefficients of higher-order power terms are the derivatives of analytic functions  $\tilde{h}_G(\lambda)$  and  $\tilde{h}_C(\lambda)$ , which are bounded [cf. Definition 10].

**2. Spectrum of  $(\hat{\mathbf{H}} - \mathbf{H})\mathbf{x}$ .** Consider a simplicial signal  $\mathbf{x}$  with an SFT  $\tilde{\mathbf{x}} = \mathbf{U}^\top \mathbf{x} = [\tilde{x}_1, \dots, \tilde{x}_n]$ , thus,  $\mathbf{x} = \sum_{i=1}^n \tilde{x}_i \mathbf{u}_i$ . Then, we study the effect of the difference of the SCFs on a simplicial signal from the spectral perspective via

$$(\hat{\mathbf{H}} - \mathbf{H})\mathbf{x} = \sum_{i=1}^n \tilde{x}_i \sum_{t=0}^{T_d} w_{d,t} \mathbf{D}_{d,t}^t \mathbf{u}_i + \sum_{i=1}^n \tilde{x}_i \sum_{t=0}^{T_u} w_{u,t} \mathbf{D}_{u,t}^t \mathbf{u}_i + \mathbf{F}_d \mathbf{x} + \mathbf{F}_u \mathbf{x} \quad (\text{E.12})$$

where we have

$$\mathbf{D}_{d,t}^t \mathbf{u}_i = \sum_{r=0}^{t-1} (\mathbf{L}_d^r \mathbf{E}_d \mathbf{L}_d^{t-r} + \mathbf{L}_d^{r+1} \mathbf{E}_d \mathbf{L}_d^{t-r-1}) \mathbf{u}_i, \text{ and } \mathbf{D}_{u,t}^t \mathbf{u}_i = \sum_{r=0}^{t-1} (\mathbf{L}_u^r \mathbf{E}_u \mathbf{L}_u^{t-r} + \mathbf{L}_u^{r+1} \mathbf{E}_u \mathbf{L}_u^{t-r-1}) \mathbf{u}_i. \quad (\text{E.13})$$

Since the lower and upper Laplacians admit the eigendecompositions for an eigenvector  $\mathbf{u}_i$

$$\mathbf{L}_d \mathbf{u}_i = \lambda_{di} \mathbf{u}_i, \quad \mathbf{L}_u \mathbf{u}_i = \lambda_{ui} \mathbf{u}_i, \quad (\text{E.14})$$

we can express the terms in (E.12) as

$$\mathbf{L}_d^r \mathbf{E}_d \mathbf{L}_d^{t-r} \mathbf{u}_i = \mathbf{L}_d^r \mathbf{E}_d \lambda_{di}^{t-r} \mathbf{u}_i = \lambda_{di}^{t-r} \mathbf{L}_d^r (q_{di} \mathbf{u}_i + \mathbf{E}_1 \mathbf{u}_i) = q_{di} \lambda_{di}^t \mathbf{u}_i + \lambda_{di}^{t-r} \mathbf{L}_d^r \mathbf{E}_1 \mathbf{u}_i, \quad (\text{E.15})$$

where the second equality holds from Lemma 19. Thus, we have

$$\mathbf{L}_d^{r+1} \mathbf{E}_d \mathbf{L}_d^{t-r-1} \mathbf{u}_i = q_{di} \lambda_{di}^t \mathbf{u}_i + \lambda_{di}^{t-r-1} \mathbf{L}_d^{r+1} \mathbf{E}_1 \mathbf{u}_i. \quad (\text{E.16})$$

With the results in (E.15) and (E.16), we can write the first term in (E.12) as

$$\begin{aligned} \sum_{i=1}^n \tilde{x}_i \sum_{t=0}^{T_d} w_{d,t} \mathbf{D}_{d,t}^t \mathbf{u}_i &= \underbrace{\sum_{i=1}^n \tilde{x}_i \sum_{t=0}^{T_d} w_{d,t} \sum_{r=0}^{t-1} 2q_{di} \lambda_{di}^t \mathbf{u}_i}_{\text{term 1}} \\ &+ \underbrace{\sum_{i=1}^n \tilde{x}_i \sum_{t=0}^{T_d} w_{d,t} \sum_{r=0}^{t-1} (\lambda_{di}^{t-r} \mathbf{L}_d^r \mathbf{E}_1 \mathbf{u}_i + \lambda_{di}^{t-r-1} \mathbf{L}_d^{r+1} \mathbf{E}_1 \mathbf{u}_i)}_{\text{term 2}}. \end{aligned} \quad (\text{E.17})$$

Term 1 can be further expanded as

$$\text{term 1} = 2 \sum_{i=1}^n \tilde{x}_i q_{di} \sum_{t=0}^{T_d} t w_{d,t} \lambda_{di}^t \mathbf{u}_i = 2 \sum_{i=1}^n \tilde{x}_i q_{di} \lambda_{di} \tilde{h}'_G(\lambda_{di}) \mathbf{u}_i \quad (\text{E.18})$$

where we used the fact that  $\sum_{t=0}^{T_d} t w_{d,t} \lambda_{di}^t = \lambda_{di} \tilde{h}'_G(\lambda_{di})$ . Using  $\mathbf{L}_d = \mathbf{U} \mathbf{\Lambda}_d \mathbf{U}^\top$  we can write term 2 in (E.17) as

$$\text{term 2} = \sum_{i=1}^n \tilde{x}_i \mathbf{U} \text{diag}(\mathbf{g}_{di}) \mathbf{U}^\top \mathbf{E}_1 \mathbf{u}_i \quad (\text{E.19})$$

853 where  $\mathbf{g}_{di} \in \mathbb{R}^n$  has the  $j$ th entry

$$[\mathbf{g}_{di}]_j = \sum_{t=0}^{T_d} w_{d,t} \sum_{r=0}^{t-1} \left( \lambda_{di}^{t-r} [\mathbf{\Lambda}_d]_j^r + \lambda_{di}^{t-r-1} [\mathbf{\Lambda}_d]_j^{r+1} \right) = \begin{cases} 2\lambda_{di} \tilde{h}'_G(\lambda_{di}) & \text{for } j = i, \\ \frac{\lambda_{di} + \lambda_{dj}}{\lambda_{di} - \lambda_{dj}} (\tilde{h}_G(\lambda_{di}) - \tilde{h}_G(\lambda_{dj})) & \text{for } j \neq i. \end{cases} \quad (\text{E.20})$$

854 Now, substituting (E.18) and (E.19) into (E.17), we have

$$\sum_{i=1}^n \tilde{x}_i \sum_{t=0}^{T_d} w_{d,t} \mathbf{D}_{d,t}^t \mathbf{u}_i = 2 \sum_{i=1}^n \tilde{x}_i q_{di} \lambda_{di} \tilde{h}'_G(\lambda_{di}) \mathbf{u}_i + \sum_{i=1}^n \tilde{x}_i \mathbf{U} \text{diag}(\mathbf{g}_{di}) \mathbf{U}^\top \mathbf{E}_1 \mathbf{u}_i. \quad (\text{E.21})$$

855 By following the same steps as in (E.17)-(E.20), we can express also the second term in (E.12) as

$$\sum_{i=1}^n \tilde{x}_i \sum_{t=0}^{T_d} w_{u,t} \mathbf{D}_{u,t}^t \mathbf{u}_i = 2 \sum_{i=1}^n \tilde{x}_i q_{ui} \lambda_{ui} \tilde{h}'_G(\lambda_{ui}) \mathbf{u}_i + \sum_{i=1}^n \tilde{x}_i \mathbf{U} \text{diag}(\mathbf{g}_{ui}) \mathbf{U}^\top \mathbf{E}_2 \mathbf{u}_i \quad (\text{E.22})$$

856 where  $\mathbf{g}_{ui} \in \mathbb{R}^n$  is defined as

$$[\mathbf{g}_{ui}]_j = \sum_{t=0}^{T_d} w_{u,t} \sum_{r=0}^{t-1} \left( \lambda_{ui}^{t-r} [\mathbf{\Lambda}_u]_j^r + \lambda_{ui}^{t-r-1} [\mathbf{\Lambda}_u]_j^{r+1} \right) = \begin{cases} 2\lambda_{ui} \tilde{h}'_G(\lambda_{ui}) & \text{for } j = i, \\ \frac{\lambda_{ui} + \lambda_{uj}}{\lambda_{ui} - \lambda_{uj}} (\tilde{h}_G(\lambda_{ui}) - \tilde{h}_G(\lambda_{uj})) & \text{for } j \neq i. \end{cases} \quad (\text{E.23})$$

857 **3. Bound of  $\|(\hat{\mathbf{H}} - \mathbf{H})\mathbf{x}\|$ .** Now we are ready to bound  $\|(\hat{\mathbf{H}} - \mathbf{H})\mathbf{x}\|$  based on triangle inequality.  
858 First, given the small perturbations  $\|\mathbf{E}_d\| \leq \epsilon_d$  and  $\|\mathbf{E}_u\| \leq \epsilon_u$ , we have for the last two terms in  
859 (E.12)

$$\|\mathbf{F}_d \mathbf{x}\| \leq \mathcal{O}(\epsilon_d^2) \|\mathbf{x}\|, \text{ and } \|\mathbf{F}_u \mathbf{x}\| \leq \mathcal{O}(\epsilon_u^2) \|\mathbf{x}\|. \quad (\text{E.24})$$

860 Second, for the first term  $\|\sum_{i=1}^n \tilde{x}_i \sum_{t=0}^{T_d} w_{d,t} \mathbf{D}_{d,t}^t \mathbf{u}_i\|$  in (E.12), we can bound its two terms in (E.18)  
861 and (E.19) as

$$\left\| \sum_{i=1}^n \tilde{x}_i \sum_{t=0}^{T_d} w_{d,t} \mathbf{D}_{d,t}^t \mathbf{u}_i \right\| \leq \left\| 2 \sum_{i=1}^n \tilde{x}_i q_{di} \lambda_{di} \tilde{h}'_G(\lambda_{di}) \mathbf{u}_i \right\| + \left\| \sum_{i=1}^n \tilde{x}_i \mathbf{U} \text{diag}(\mathbf{g}_{di}) \mathbf{U}^\top \mathbf{E}_1 \mathbf{u}_i \right\|. \quad (\text{E.25})$$

862 For the first term on the RHS of (E.25), we can write

$$\left\| 2 \sum_{i=1}^n \tilde{x}_i q_{di} \lambda_{di} \tilde{h}'_G(\lambda_{di}) \mathbf{u}_i \right\|^2 \leq 4 \sum_{i=1}^n |\tilde{x}_i|^2 |q_{di}|^2 |\lambda_{di} \tilde{h}'_G(\lambda_{di})|^2 \leq 4\epsilon_d^2 c_d^2 \|\mathbf{x}\|^2, \quad (\text{E.26})$$

863 which results from, first,  $|q_{di}| \leq \epsilon_d = \|\mathbf{E}_d\|$  since  $q_{di}$  is an eigenvalue of  $\mathbf{E}_d$ ; second, the integral  
864 Lipschitz property of the SCF  $|\lambda \tilde{h}'_G(\lambda)| \leq c_d$ ; and lastly, the fact that  $\sum_{i=1}^n |\tilde{x}_i|^2 = \|\tilde{\mathbf{x}}\|^2 = \|\mathbf{x}\|^2$   
865 and  $\|\mathbf{u}_i\|^2 = 1$ . We then have

$$\left\| 2 \sum_{i=1}^n \tilde{x}_i q_{di} \lambda_{di} \tilde{h}'_G(\lambda_{di}) \mathbf{u}_i \right\| \leq 2\epsilon_d c_d \|\mathbf{x}\|. \quad (\text{E.27})$$

866 For the second term in RHS of (E.25), we have

$$\left\| \sum_{i=1}^n \tilde{x}_i \mathbf{U} \text{diag}(\mathbf{g}_{di}) \mathbf{U}^\top \mathbf{E}_1 \mathbf{u}_i \right\| \leq \sum_{i=1}^n |\tilde{x}_i| \|\mathbf{U} \text{diag}(\mathbf{g}_{di}) \mathbf{U}^\top\| \|\mathbf{E}_1\| \|\mathbf{u}_i\|, \quad (\text{E.28})$$

867 which stems from the triangle inequality. We further have  $\|\mathbf{U} \text{diag}(\mathbf{g}_{di}) \mathbf{U}^\top\| = \|\text{diag}(\mathbf{g}_{di})\| \leq 2C_d$   
868 resulting from  $\|\mathbf{U}\| = 1$  and the  $c_d$ -integral Lipschitz of  $\tilde{h}_G(\lambda)$  [cf. Definition 10]. Moreover, it  
869 follows that  $\|\mathbf{E}_1\| \leq \epsilon_d \delta_d$  from Lemma 19, which results in

$$\left\| \sum_{i=1}^n \tilde{x}_i \mathbf{U} \text{diag}(\mathbf{g}_{di}) \mathbf{U}^\top \mathbf{E}_1 \mathbf{u}_i \right\| \leq 2C_d \epsilon_d \delta_d \sqrt{n} \|\mathbf{x}\| \quad (\text{E.29})$$

870 where we use that  $\sum_{i=1}^n |\tilde{x}_i| = \|\tilde{\mathbf{x}}\|_1 \leq \sqrt{n} \|\tilde{\mathbf{x}}\| = \sqrt{n} \|\mathbf{x}\|$ . By combining (E.26) and (E.29), we  
871 have

$$\left\| \sum_{i=1}^n \tilde{x}_i \sum_{t=0}^{T_d} w_{d,t} \mathbf{D}_{d,t}^t \mathbf{u}_i \right\| \leq 2\epsilon_d c_d \|\mathbf{x}\| + 2C_d \epsilon_d \delta_d \sqrt{n} \|\mathbf{x}\|. \quad (\text{E.30})$$

872 Analogously, we can show that

$$\left\| \sum_{i=1}^n \tilde{x}_i \sum_{t=0}^{T_d} w_{u,t} \mathbf{D}_{u,t}^t \mathbf{u}_i \right\| \leq 2\epsilon_u c_u \|\mathbf{x}\| + 2C_u \epsilon_u \delta_u \sqrt{n} \|\mathbf{x}\|. \quad (\text{E.31})$$

873 Now by combining (E.24), (E.30) and (E.31), we can bound  $\|(\hat{\mathbf{H}} - \mathbf{H})\mathbf{x}\|$  as

$$\begin{aligned} \|(\hat{\mathbf{H}} - \mathbf{H})\mathbf{x}\| &\leq 2\epsilon_d c_d \|\mathbf{x}\| + 2C_d \epsilon_d \delta_d \sqrt{n} \|\mathbf{x}\| + \mathcal{O}(\epsilon_d^2) \|\mathbf{x}\| \\ &\quad + 2\epsilon_u c_u \|\mathbf{x}\| + 2C_u \epsilon_u \delta_u \sqrt{n} \|\mathbf{x}\| + \mathcal{O}(\epsilon_u^2) \|\mathbf{x}\|. \end{aligned} \quad (\text{E.32})$$

874 By defining  $\Delta_d = 2(1 + \delta_d \sqrt{n})$  and  $\Delta_u = 2(1 + \delta_u \sqrt{n})$ , we can obtain that

$$\|\hat{\mathbf{H}} - \mathbf{H}\| \leq c_d \Delta_d \epsilon_d + c_u \Delta_u \epsilon_u + \mathcal{O}(\epsilon_d^2) + \mathcal{O}(\epsilon_u^2). \quad (\text{E.33})$$

875 Thus, we have  $\|\mathbf{H}_k^l - \hat{\mathbf{H}}_k^l\| \leq c_{k,d} \Delta_{k,d} \epsilon_{k,d} + c_{k,u} \Delta_{k,u} \epsilon_{k,u}$  with  $\Delta_{k,d} = 2(1 + \delta_{k,d} \sqrt{n_k})$  and  
 876  $\Delta_{k,u} = 2(1 + \delta_{k,u} \sqrt{n_k})$  where we ignore the second and higher order terms on  $\epsilon_{k,d}$  and  $\epsilon_{k,u}$ . Likewise,  
 877 we have  $\|\mathbf{H}_{k,d}^l - \hat{\mathbf{H}}_{k,d}^l\| \leq c_{k,d} \Delta_{k,d} \epsilon_{k,d}$  for the lower SCF and  $\|\mathbf{H}_{k,u}^l - \hat{\mathbf{H}}_{k,u}^l\| \leq c_{k,u} \Delta_{k,u} \epsilon_{k,u}$  for  
 878 the upper SCF.  $\square$

### 879 E.1.2 Step II: Stability of SCCNNs

880 *Proof.* Given the initial input  $\mathbf{x}_k^0$ , the Euclidean distance between  $\mathbf{x}_k^l$  and  $\hat{\mathbf{x}}_k^l$  at layer  $l$  can be bounded  
 881 by using triangle inequality and the  $c_\sigma$ -Lipschitz property of  $\sigma(\cdot)$  [cf. Assumption 11] as

$$\|\hat{\mathbf{x}}_k^l - \mathbf{x}_k^l\|_2 \leq c_\sigma (\phi_{k,d}^l + \phi_k^l + \phi_{k,u}^l), \quad (\text{E.34})$$

882 with

$$\begin{aligned} \phi_{k,d}^l &:= \|\hat{\mathbf{H}}_{k,d}^l \hat{\mathbf{R}}_{k,d} \hat{\mathbf{x}}_{k-1}^{l-1} - \mathbf{H}_{k,d}^l \mathbf{R}_{k,d} \mathbf{x}_{k-1}^{l-1}\|, \\ \phi_k^l &:= \|\hat{\mathbf{H}}_k^l \hat{\mathbf{x}}_k^{l-1} - \mathbf{H}_k^l \mathbf{x}_k^{l-1}\|, \\ \phi_{k,u}^l &:= \|\hat{\mathbf{H}}_{k,u}^l \hat{\mathbf{R}}_{k,u} \hat{\mathbf{x}}_{k+1}^{l-1} - \mathbf{H}_{k,u}^l \mathbf{R}_{k,u} \mathbf{x}_{k+1}^{l-1}\|. \end{aligned} \quad (\text{E.35})$$

883 We now focus on upper bounding each of the terms.

884 **1. Term  $\phi_k^l$ .** By subtracting and adding  $\hat{\mathbf{H}}_k^l \mathbf{x}_k^{l-1}$  within the norm, and using the triangle inequality,  
 885 we obtain

$$\begin{aligned} \phi_k^l &\leq \|\hat{\mathbf{H}}_k^l (\hat{\mathbf{x}}_k^{l-1} - \mathbf{x}_k^{l-1})\| + \|(\hat{\mathbf{H}}_k^l - \mathbf{H}_k^l) \mathbf{x}_k^{l-1}\| \leq \|\hat{\mathbf{x}}_k^{l-1} - \mathbf{x}_k^{l-1}\| + \|\hat{\mathbf{H}}_k^l - \mathbf{H}_k^l\| \|\mathbf{x}_k^{l-1}\| \\ &\leq \|\hat{\mathbf{x}}_k^{l-1} - \mathbf{x}_k^{l-1}\| + (c_{k,d} \Delta_{k,d} \epsilon_{k,d} + c_{k,u} \Delta_{k,u} \epsilon_{k,u}) \|\mathbf{x}_k^{l-1}\| \end{aligned} \quad (\text{E.36})$$

886 where we used the SCF stability in (E.33) and that all SCFs have a normalized bounded frequency  
 887 response in Assumption 11. Note that  $\hat{\mathbf{H}}_k^l$  is also characterized by  $\tilde{h}_G(\lambda)$  with the same set of filter  
 888 coefficients as  $\mathbf{H}_k^l$ .

889 **2. Term  $\phi_{k,d}^l$  and  $\phi_{k,u}^l$ .** By subtracting and adding a term  $\hat{\mathbf{H}}_{k,d}^l \hat{\mathbf{R}}_{k,d} \mathbf{x}_{k-1}^{l-1}$  within the norm, we have

$$\begin{aligned} \phi_{k,d}^l &\leq \|\hat{\mathbf{H}}_{k,d}^l \hat{\mathbf{R}}_{k,d} (\hat{\mathbf{x}}_{k-1}^{l-1} - \mathbf{x}_{k-1}^{l-1})\| + \|(\hat{\mathbf{H}}_{k,d}^l \hat{\mathbf{R}}_{k,d} - \mathbf{H}_{k,d}^l \mathbf{R}_{k,d}) \mathbf{x}_{k-1}^{l-1}\| \\ &\leq \|\hat{\mathbf{R}}_{k,d}\| \|\hat{\mathbf{x}}_{k-1}^{l-1} - \mathbf{x}_{k-1}^{l-1}\| + \|\hat{\mathbf{H}}_{k,d}^l \hat{\mathbf{R}}_{k,d} - \mathbf{H}_{k,d}^l \mathbf{R}_{k,d}\| \|\mathbf{x}_{k-1}^{l-1}\|, \end{aligned} \quad (\text{E.37})$$

890 where we used again triangle inequality and  $\|\hat{\mathbf{H}}_{k,d}^l\| \leq 1$  from Assumption 11. For the term  $\|\hat{\mathbf{R}}_{k,d}^l\|$ ,  
 891 we have  $\|\hat{\mathbf{R}}_{k,d}^l\| \leq \|\mathbf{R}_{k,d}^l\| + \|\mathbf{J}_{k,d}\| \|\mathbf{R}_{k,d}^l\| \leq r_{k,d} (1 + \varepsilon_{k,d})$  where we used  $\|\mathbf{R}_{k,d}^l\| \leq r_{k,d}$  in  
 892 Assumption 11 and  $\|\mathbf{J}_{k,d}\| \leq \varepsilon_{k,d}$ . For the second term of RHS in (E.37), by adding and subtracting  
 893  $\hat{\mathbf{H}}_{k,d}^l \mathbf{R}_{k,d}^l$  we have

$$\begin{aligned} \|\hat{\mathbf{H}}_{k,d}^l \hat{\mathbf{R}}_{k,d} - \mathbf{H}_{k,d}^l \mathbf{R}_{k,d}\| &= \|\hat{\mathbf{H}}_{k,d}^l \hat{\mathbf{R}}_{k,d} - \hat{\mathbf{H}}_{k,d}^l \mathbf{R}_{k,d}^l + \hat{\mathbf{H}}_{k,d}^l \mathbf{R}_{k,d}^l - \mathbf{H}_{k,d}^l \mathbf{R}_{k,d}\| \\ &\leq \|\hat{\mathbf{H}}_{k,d}^l\| \|\hat{\mathbf{R}}_{k,d} - \mathbf{R}_{k,d}^l\| + \|\hat{\mathbf{H}}_{k,d}^l - \mathbf{H}_{k,d}^l\| \|\mathbf{R}_{k,d}^l\| \\ &\leq r_{k,d} \varepsilon_{k,d} + C'_{k,d} \Delta_{k,d} \epsilon_{k,d} r_{k,d} \end{aligned} \quad (\text{E.38})$$

where we use the stability result of the lower SCF  $\mathbf{H}_{k,d}^l$  in (E.33). By substituting (E.38) into (E.37), we have

$$\phi_{k,d}^l \leq \hat{r}_{k,d} \|\hat{\mathbf{x}}_{k-1}^{l-1} - \mathbf{x}_{k-1}^{l-1}\| + (r_{k,d} \varepsilon_{k,d} + C'_{k,d} \Delta_{k,d} \varepsilon_{k,d} r_{k,d}) \|\mathbf{x}_{k-1}^{l-1}\|. \quad (\text{E.39})$$

By following the same procedure [cf. (E.37) and (E.38)], we obtain

$$\phi_{k,u}^l \leq \hat{r}_{k,u} \|\hat{\mathbf{x}}_{k+1}^{l-1} - \mathbf{x}_{k+1}^{l-1}\| + (r_{k,u} \varepsilon_{k,u} + C'_{k,u} \Delta_{k,u} \varepsilon_{k,u} r_{k,u}) \|\mathbf{x}_{k+1}^{l-1}\|. \quad (\text{E.40})$$

**3. Bound of  $\|\hat{\mathbf{x}}_k^l - \mathbf{x}_k^l\|$ .** Using the notations  $t_k, t_{k,d}$  and  $t_{k,u}$  in Theorem 12, we then have a set of recursions, for  $k = 0, 1, \dots, K$

$$\begin{aligned} \|\hat{\mathbf{x}}_k^l - \mathbf{x}_k^l\| \leq & c_\sigma (\hat{r}_{k,d} \|\hat{\mathbf{x}}_{k-1}^{l-1} - \mathbf{x}_{k-1}^{l-1}\| + t_{k,d} \|\mathbf{x}_{k-1}^{l-1}\| + \|\hat{\mathbf{x}}_k^{l-1} - \mathbf{x}_k^{l-1}\| + t_k \|\mathbf{x}_k^{l-1}\| \\ & + \hat{r}_{k,u} \|\hat{\mathbf{x}}_{k+1}^{l-1} - \mathbf{x}_{k+1}^{l-1}\| + t_{k,u} \|\mathbf{x}_{k+1}^{l-1}\|). \end{aligned} \quad (\text{E.41})$$

Define vector  $\mathbf{b}^l$  as  $[\mathbf{b}^l]_k = \|\hat{\mathbf{x}}_k^l - \mathbf{x}_k^l\|$  with  $\mathbf{b}^0 = \mathbf{0}$ . Let  $\beta^l$  collect the energy of all outputs at layer  $l$ , with  $[\beta^l]_k := \|\mathbf{x}_k^{l-1}\|$ . We can express the Euclidean distances of all  $k$ -simplicial signal outputs for  $k = 0, 1, \dots, K$ , as

$$\mathbf{b}^l \preceq c_\sigma \hat{\mathbf{Z}} \mathbf{b}^{l-1} + c_\sigma \mathbf{T} \beta^{l-1} \quad (\text{E.42})$$

where  $\preceq$  indicates elementwise smaller than or equal, and we have

$$\mathbf{T} = \begin{bmatrix} t_0 & t_{0,u} & & & \\ t_{1,d} & t_1 & t_{1,u} & & \\ & \ddots & \ddots & \ddots & \\ & & t_{K-1,d} & t_{K-1} & t_{K-1,u} \\ & & & t_{K,d} & t_K \end{bmatrix} \text{ and } \hat{\mathbf{Z}} = \begin{bmatrix} 1 & \hat{r}_{0,u} & & & \\ \hat{r}_{1,d} & 1 & \hat{r}_{1,u} & & \\ & \ddots & \ddots & \ddots & \\ & & \hat{r}_{K-1,d} & 1 & \hat{r}_{K-1,u} \\ & & & \hat{r}_{K,d} & 1 \end{bmatrix}. \quad (\text{E.43})$$

We are now interested in building a recursion for (E.42) for all layers  $l$ . We start with term  $\mathbf{x}_k^l$ . Based on its expression in (E.2), we bound it as

$$\begin{aligned} \|\mathbf{x}_k^l\| \leq & c_\sigma (\|\mathbf{H}_{k,d}^l\| \|\mathbf{R}_{k,d}\| \|\mathbf{x}_{k-1}^{l-1}\| + \|\mathbf{H}_k^l\| \|\mathbf{x}_x^{l-1}\| + \|\mathbf{H}_{k,u}^l\| \|\mathbf{R}_{k,u}\| \|\mathbf{x}_{k+1}^{l-1}\|) \\ \leq & c_\sigma (r_{k,d} \|\mathbf{x}_{k-1}^{l-1}\| + \|\mathbf{x}_x^{l-1}\| + r_{k,u} \|\mathbf{x}_{k+1}^{l-1}\|), \end{aligned} \quad (\text{E.44})$$

which holds for  $k = 0, 1, \dots, K$ . Thus, it can be expressed in the vector form as  $\beta^l \preceq c_\sigma \mathbf{Z} \beta^{l-1}$ , with

$$\mathbf{Z} = \begin{bmatrix} 1 & r_{0,u} & & & \\ r_{1,d} & 1 & r_{1,u} & & \\ & \ddots & \ddots & \ddots & \\ & & r_{K-1,d} & 1 & r_{K-1,u} \\ & & & r_{K,d} & 1 \end{bmatrix}. \quad (\text{E.45})$$

Similarly, we have  $\beta^{l-1} \preceq c_\sigma \mathbf{Z} \beta^{l-2}$ , leading to  $\beta^l \preceq c_\sigma^l \mathbf{Z}^l \beta^0$  with  $\beta^0 = \beta$  [cf. Assumption 11]. We can then express the bound (E.42) as

$$\mathbf{b}^l \preceq c_\sigma \hat{\mathbf{Z}} \mathbf{b}^{l-1} + c_\sigma^l \mathbf{T} \mathbf{Z}^{l-1} \beta. \quad (\text{E.46})$$

Thus, we have

$$\mathbf{b}^0 = \mathbf{0}, \mathbf{b}^1 \preceq c_\sigma \mathbf{T} \beta, \mathbf{b}^2 \preceq c_\sigma^2 (\hat{\mathbf{Z}} \mathbf{T} \beta + \mathbf{T} \mathbf{Z} \beta), \mathbf{b}^3 \preceq c_\sigma^3 (\hat{\mathbf{Z}}^2 \mathbf{T} \beta + \hat{\mathbf{Z}} \mathbf{T} \mathbf{Z} \beta + \mathbf{T} \mathbf{Z}^2 \beta), \mathbf{b}^4 \preceq \dots, \quad (\text{E.47})$$

which, inductively, leads to

$$\mathbf{b}^l \preceq c_\sigma^l \sum_{i=1}^l \hat{\mathbf{Z}}^{i-1} \mathbf{T} \mathbf{Z}^{l-i} \beta. \quad (\text{E.48})$$

By setting  $l = L$ , we obtain the bound  $\mathbf{b}^L \preceq \mathbf{d} = c_\sigma^L \sum_{l=1}^L \hat{\mathbf{Z}}^{l-1} \mathbf{T} \mathbf{Z}^{L-l} \beta$  in Theorem 12.  $\square$

## F Experiment details

### F.1 Synthetic experiments on Dirichlet energy evolution

We created a synthetic SC with 100 nodes, 241 edges and 135 triangles with the GUDHI toolbox [67], and we set the initial inputs on three levels of simplices to be random sampled from  $\mathcal{U}([-5, 5])$ . We then built a SCCNN composed of simplicial shifting layers with weight  $w_0$  and nonlinearities including id, tanh and relu. When the weight follows the condition in Proposition 3, from Fig. F.1 (the dashed lines labeled as “shift”), we see that the Dirichlet energies of all three outputs exponentially decrease as the number of layers increases. We then uncoupled the lower and upper parts of the Laplacians in the edge space in the shifting layers by setting  $\gamma \neq 1$ . As shown in Fig. F.1 (the dotted lines), the Dirichlet energies of the edge outputs decrease at a slower rate than before. Lastly, we added the inter-simplicial couplings, which overcome the oversmoothing problems, as shown by the solid lines.

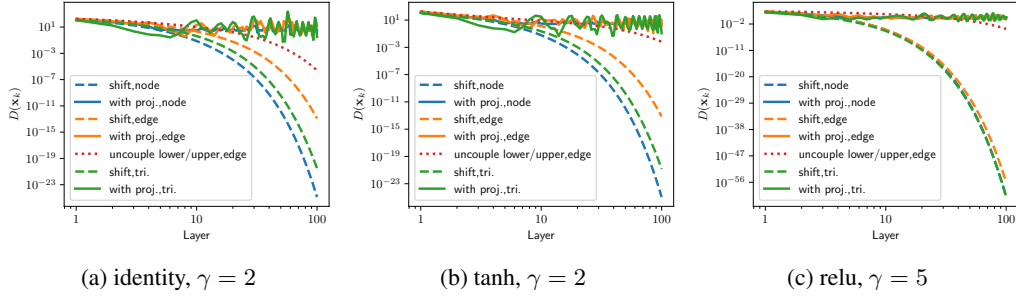

Figure F.1: Oversmoothing effects of simplicial shifting and the mitigation effects of uncoupling lower and upper adjacencies and accounting for inter-simplicial couplings.

### F.2 Additional details on Forex experiments

In the forex dataset, there are 25 currencies which can be exchanged pairwise at three timestamps. We first represented their exchange rates on the edges and took the logarithm, i.e.,  $[\mathbf{x}_1]_{[i,j]} = \log_{10} r^i/j = -[\mathbf{x}_1]_{[j,i]}$ . Then, the total arbitrage can be computed as the total curl  $\mathbf{B}_2^\top \mathbf{x}_1$ .

We considered to recover the exchange rates under three types of settings: 1) random noise following normal distribution such that the signal-to-noise ration is  $-3\text{dB}$ , which is spread over the whole simplicial spectrum; 2) “curl noise” projected from triangle noise following normal distribution such that the signal-to-noise ration is  $-3\text{dB}$ , which is distributed only in the curl space; and 3) 50% of the total forex rates are recorded and the other half is not available, set as zero values.

Table F.1: Forex results (nmse, arbitrage) and the corresponding hyperparameters.

| Methods        | Random noise                                                                 | “Curl noise”                                                               | Interpolation                                                              |
|----------------|------------------------------------------------------------------------------|----------------------------------------------------------------------------|----------------------------------------------------------------------------|
| Input          | $0.119 \pm 0.004, 25.19 \pm 0.874$                                           | $0.552 \pm 0.027, 122.36 \pm 5.90$                                         | $0.717 \pm 0.030, 106.40 \pm 0.902$                                        |
| $\ell_2$ -norm | $0.036 \pm 0.005, 2.29 \pm 0.079$                                            | $0.050 \pm 0.002, 11.12 \pm 0.537$                                         | $0.534 \pm 0.043, 9.67 \pm 0.082$                                          |
| SNN            | $0.11 \pm 0.005, 23.24 \pm 1.03$<br>$L = 5, F = 64, T = 4, \tanh$            | $0.446 \pm 0.017, 86.947 \pm 2.197$<br>$L = 6, F = 64, T = 3, \tanh$       | $0.702 \pm 0.033, 104.738 \pm 1.042$<br>$L = 2, F = 64, T = 1, \tanh$      |
| PSNN           | $0.008 \pm 0.001, 0.984 \pm 0.17$<br>$L = 6, F = 64, \tanh$                  | $0.000 \pm 0.000, 0.000 \pm 0.000$<br>$L = 5, F = 1, T = 4, \text{id}$     | $0.009 \pm 0.001, 1.128 \pm 0.329$<br>$L = 6, F = 64, T = 4, \tanh$        |
| Bunch          | $0.981 \pm 0.0, 22.912 \pm 1.228$<br>—                                       | $0.981 \pm 0.0, 22.912 \pm 1.228$<br>—                                     | $0.983 \pm 0.005, 19.887 \pm 6.341$<br>—                                   |
| MPSN           | $0.039 \pm 0.004, 7.748 \pm 0.943$<br>$L = 2, F = 64, \text{id}, \text{sum}$ | $0.076 \pm 0.012, 14.922 \pm 2.493$<br>$L = 4, F = 64, \tanh, \text{mean}$ | $0.117 \pm 0.063, 23.147 \pm 11.674$<br>$L = 2, F = 64, \tanh, \text{sum}$ |
| SCCNN, id      | $0.027 \pm 0.005, 0.000 \pm 0.000$<br>$L = 2, F = 16, T_d = 0, T_u = 3$      | $0.000 \pm 0.000, 0.000 \pm 0.000$<br>$L = 5, F = 1, T_d = 1, T_u = 1$     | $0.265 \pm 0.036, 0.000 \pm 0.000$<br>$L = 2, F = 16, T_d = 0, T_u = 3$    |
| SCCNN, tanh    | $0.002 \pm 0.000, 0.325 \pm 0.082$<br>$L = 6, F = 64, T_d = 5, T_u = 2$      | $0.000 \pm 0.000, 0.003 \pm 0.003$<br>$L = 1, F = 64, T_d = 2, T_u = 2$    | $0.003 \pm 0.002, 0.279 \pm 0.151$<br>$L = 6, F = 64, T_d = 5, T_u = 1$    |

First, as a baseline method, we chose  $\ell_2$  norm of the curl  $\mathbf{B}_2\mathbf{x}_1$  as a regularizer to reduce the total arbitrage, i.e.,  $\hat{\mathbf{x}}_1 = (\mathbf{I} + w\mathbf{L}_{1,u})^{-1}\mathbf{x}_1$  with a regularization weight  $w \in [0, 10]$ . For the learning methods, we consider the following hyperparameter ranges: the number of layers to be  $L \in \{1, 2, \dots, 6\}$ , the number of intermediate features to be  $F \in \{1, 16, 32, 64\}$ . For the convolutional methods including SNN [15], PSNN [16], Bunch [14] and SCCNN, we considered the intermediate layers with nonlinearities including id and tanh. The convolution orders of SNN and SCCNN are set to be  $\{1, 2, \dots, 5\}$ . For the message-passing method, MPSN [17], we considered the setting from [17, Eq. 35] where the sum and mean aggregations are used and each message update function is a two-layer MLP. With these noisy or masked rates as inputs and the clean arbitrage-free rates as outputs, we trained different learning methods at the first timestamp, and validated the hyperparameters at the second timestamp, and tested their performance at the third one. During the training of 1000 epochs, a normalized MSE loss function and adam optimizer with a fixed learning rate of 0.001 are used. We run the same experiments for 10 times. Table F.1 reports the best results (nmse) and the total arbitrage, together with the hyperparameters.

### F.3 Additional details on Simplex prediction

#### F.3.1 Method in Detail

The method for simplex prediction is generalized from link prediction based on GNNs by [52]: For  $k$ -simplex prediction, we use an SCCNN in an SC of order up to  $k$  to first learn the features of lower-order simplices up to order  $k - 1$ . Then, we concatenate these embedded lower-order simplicial features and input them to a two-layer MLP which predicts if a  $k$ -simplex is positive (closed, shall be included in the SC) or negative (open, not included in the SC).

For example, in 2-simplex prediction, consider an SC of order two, which is built based on nodes, edges and (existing positive) triangles. Given the initial inputs on nodes  $\mathbf{x}_0$  and on edges  $\mathbf{x}_1$  and zero inputs on triangles  $\mathbf{x}_2 = \mathbf{0}$  since we assume no prior knowledge on triangles, for an open triangle  $t = [i, j, k]$ , an SCCNN is used to learn features on nodes and edges (denoted by  $\mathbf{y}$ ). Then, we input the concatenation of the features on three nodes or three edges to an MLP, i.e.,  $\text{MLP}_{\text{node}}([\mathbf{y}_0]_i \parallel [\mathbf{y}_0]_j \parallel [\mathbf{y}_0]_k)$  or  $\text{MLP}_{\text{edge}}([\mathbf{y}]_{[i,j]} \parallel [\mathbf{y}]_{[j,k]} \parallel [\mathbf{y}]_{[i,k]})$ , to predict if triangle  $t$  is positive or negative. A MLP taking both node and edge features is possible, but we keep it on one simplex level for complexity purposes. Similarly, we consider an SCCNN in an SC of order three for 3-simplex prediction, which is followed by an MLP operating on either nodes, edges or triangles.

#### F.3.2 Data Preprocessing

We consider the data from the Semantic Scholar Open Research Corpus [53] to construct a coauthorship complex where nodes are authors and collaborations between  $k$ -author are represented by  $(k - 1)$ -simplices. Following the preprocessing in [15], we obtain 352 nodes, 1472 edges, 3285 triangles, 5019 tetrahedrons (3-simplices) and a number of other higher-order simplices. The node signal  $\mathbf{x}_0$ , edge flow  $\mathbf{x}_1$  and triangle flow  $\mathbf{x}_2$  are the numbers of citations of single author papers and the collaborations of two and three authors, respectively.

For the 2-simplex prediction, we use the collaboration impact (the number of citations) to split the total set of triangles into the positive set  $\mathcal{T}_P = \{t | [\mathbf{x}_2]_t > 7\}$  containing 1482 closed triangles and the negative set  $\mathcal{T}_N = \{t | [\mathbf{x}_2]_t \leq 7\}$  containing 1803 open triangles such that we have balanced positive and negative samples. We further split the 80% of the positive triangle set for training, 10% for validation and 10% for testing; likewise for the negative triangle set. Note that in the construction of the SC, i.e., the incidence matrix  $\mathbf{B}_2$ , Hodge Laplacians  $\mathbf{L}_{1,u}$  and  $\mathbf{L}_{2,d}$ , we ought to remove negative triangles in the training set and all triangles in the test set. That is, for 2-simplex prediction, we only make use of the training set of the positive triangles since the negative ones are not in the SC.

Similarly, we prepare the dataset for 3-simplex (tetrahedron) prediction, amounting to the tetradic collaboration prediction. We obtain balanced positive and negative tetrahedron sets based on the citation signal  $\mathbf{x}_3$ . In the construction of  $\mathbf{B}_3$ ,  $\mathbf{L}_{2,u}$  and  $\mathbf{L}_{3,d}$ , we again only use the tetrahedrons in the positive training set.



### F.3.3 Models

For comparison, we first use heuristic methods proposed in [2] as baselines to determine if a triangle  $t = [i, j, k]$  is closed, namely, 1) Harmonic mean:  $s_t = 3/([x_1]_{[i,j]}^{-1} + [x_1]_{[j,k]}^{-1} + [x_1]_{[i,k]}^{-1})$ , 2) Geometric mean:  $s_t = \lim_{p \rightarrow 0} ([x_1]_{[i,j]}^p + [x_1]_{[j,k]}^p + [x_1]_{[i,k]}^p)^{1/p}$ , and 3) Arithmetic mean:  $s_t = ([x_1]_{[i,j]} + [x_1]_{[j,k]} + [x_1]_{[i,k]})/3$ , which compute the triangle weight based on its three faces. Similarly, we generalized these mean methods to compute the weight of a 3-simplex  $[i, j, k, m]$  based on the four triangle faces in 3-simplex prediction.

We then consider different learning methods. Specifically, 1) ‘‘Bunch’’ by [14] (we also generalized this model to 3-dimension for 3-simplex prediction); 2) Message passing simplicial network (‘‘MPSN’’) by [17] which provides a baseline of message passing scheme in comparison to the convolution scheme; 3) Principled SNN (‘‘PSNN’’) by [16]; 4) SNN by [15]; 5) SCNN by [26]; 6) GNN by [51]; 7) MLP: providing as a baseline for the effect of using inductive models.

For MLP, Bunch, MPSN and our SCCNN, we consider the outputs in the node and edge spaces, respectively, for 2-simplex prediction, which are denoted by a suffix ‘‘-Node’’ or ‘‘-Edge’’. For 3-simplex prediction, the output in the triangle space can be used as well, denoted by a suffix ‘‘-Tri.’’, where we also build SCNNs in both edge and triangle spaces.

### F.3.4 Experimental Setup and Hyperparameters

We consider the normalized Hodge Laplacians and incidence matrices, a particular version of the weighted ones [39, 29]. Specifically, we use the symmetric version of the normalized random walk Hodge Laplacians in the edge space, proposed by [41], which were used in [14, 68] as well. We generalized the definitions for triangle predictions.

**Hyperparameters.** 1) the number of layers:  $L \in \{1, 2, 3, 4, 5\}$ ; 2) the number of intermediate and output features to be the same as  $F \in \{16, 32\}$ ; 3) the convolution orders for SCCNNs are set to be the same, i.e.,  $T_d' = T_d = T_u = T_u' = T \in \{1, 2, 3, 4, 5\}$ . We do so to avoid the exponential growth of the parameter search space. For GNNs [51] and SNNs [15], we set the convolution orders to be  $T \in \{1, 2, 3, 4, 5\}$  while for SCNNs [19], we allow the lower and upper convolutions to have different orders with  $T_d, T_u \in \{1, 2, 3, 4, 5\}$ ; 4) the nonlinearity in the feature learning phase: LeakyReLU with a negative slope 0.01; 5) MPSN is set as [64]; 6) the MLP in the prediction phase: two layers with a sigmoid nonlinearity. For 2-simplex prediction, the number of the input features for the node features is  $3F$ , and for the edge features is  $3F$ . For 3-simplex prediction, the number of the input features for the node features is  $4F$ , for the edge features is  $6F$  and for the triangle features is  $4F$  since a 3-simplex has four nodes, six edges and four triangles. The number of the intermediate features is the same as the input features, and that of the output features is one; and, 7) the binary cross entropy loss and the adam optimizer with a learning rate of 0.001 are used; the number of the epochs is 1000 where an early stopping is used. We compute the AUC to compare the performance and run the same experiments for ten times with random data splitting.

### F.3.5 Results

In Table F.2, we report the best results of each method with the corresponding hyperparameters. Different hyperparameters can lead to similar results, but we report the ones with the *least* complexity. All experiments for simplex predictions were run on a single NVIDIA A40 GPU with 48 GB of memory using CUDA 11.5.

### F.3.6 Ablation Study

We perform an ablation study to observe the roles of different components in SCCNNs.

**SC Order  $K$ .** We investigate the influence of the SC order  $K$ . Table F.3 reports the 2-simplex prediction results for  $K = \{1, 2\}$  and the 3-simplex prediction results for  $K = \{1, 2, 3\}$ . We observe that for  $k$ -simplex prediction, it does not necessarily guarantee a better prediction with a higher-order SC, which further indicates that a positive simplex could be well encoded by both its faces and other lower-order subsets. For example, in 2-simplex prediction, SC of order one gives better results than SC of order two (similar for Bunch), showing that in this coauthorship complex, triadic collaborations are better encoded by features on nodes than pairwise collaborations. In 3-simplex prediction, SCs of

Table F.2: 2- (Left) and 3-Simplex (Right) prediction AUC (%) results.

| METHODS     | AUC      | PARAMETERS                        | METHODS     | AUC      | PARAMETERS                        |
|-------------|----------|-----------------------------------|-------------|----------|-----------------------------------|
| HARM. MEAN  | 62.8±2.7 | —                                 | HARM. MEAN  | 63.6±1.6 | —                                 |
| ARITH. MEAN | 60.8±3.2 | —                                 | ARITH. MEAN | 62.2±1.4 | —                                 |
| GEOM. MEAN  | 61.7±3.1 | —                                 | GEOM. MEAN  | 63.1±1.4 | —                                 |
| MLP-NODE    | 68.5±1.6 | $L = 1, F = 32$                   | MLP-TRI.    | 69.0±2.2 | $L = 3, F = 32$                   |
| GNN         | 93.9±1.0 | $L = 5, F = 32, T = 2$            | GNN         | 96.6±0.5 | $L = 5, F = 32, T = 5$            |
| SNN-EDGE    | 92.0±1.8 | $L = 5, F = 32, T = 5$            | SNN-TRI.    | 95.1±1.2 | $L = 5, F = 32, T = 5$            |
| PSNN-EDGE   | 95.6±1.3 | $L = 5, F = 32$                   | PSNN-TRI.   | 98.1±0.5 | $L = 5, F = 32$                   |
| SCNN-EDGE   | 96.5±1.5 | $L = 5, F = 32, T_d = 5, T_u = 2$ | SCNN-TRI.   | 98.3±0.4 | $L = 5, F = 32, T_d = 2, T_u = 1$ |
| BUNCH-NODE  | 98.3±0.5 | $K = 1, L = 4, F = 32$            | BUNCH-EDGE  | 98.5±0.5 | $K = 3, L = 4, F = 16$            |
| MPSN-NODE   | 98.1±0.5 | $K = 1, L = 3, F = 32$            | MPSN-EDGE   | 99.2±0.3 | $K = 3, L = 3, F = 32$            |
| SCCNN-NODE  | 98.7±0.5 | $K = 1, L = 2, F = 32, T = 2$     | SCCNN-NODE  | 99.4±0.3 | $K = 3, L = 3, F = 32, T = 3$     |

different orders give similar results, showing that tetradic collaborations can be encoded by nodes, as well as by pairwise and triadic collaborations.

Table F.3: Prediction results of SCCNNs with different SC order  $K$ .

| METHOD     | 2-SIMPLEX | PARAMETERS                    | METHOD     | 3-SIMPLEX | PARAMETERS                    |
|------------|-----------|-------------------------------|------------|-----------|-------------------------------|
| SCCNN-NODE | 98.7±0.5  | $K = 1, L = 2, F = 32, T = 2$ | SCCNN-NODE | 99.3±0.3  | $K = 1, L = 2, F = 32, T = 1$ |
| SCCNN-NODE | 98.4±0.5  | $K = 2, L = 2, F = 32, T = 2$ | SCCNN-NODE | 99.3±0.2  | $K = 2, L = 2, F = 32, T = 5$ |
| BUNCH-NODE | 98.3±0.4  | $K = 1, L = 4, F = 32$        | SCCNN-NODE | 99.4±0.3  | $K = 3, L = 3, F = 32, T = 3$ |
| BUNCH-NODE | 98.0±0.4  | $K = 2, L = 4, F = 32$        | MPSN-NODE  | 96.0±1.2  | $K = 1, L = 3, F = 32$        |
| MPSN-NODE  | 94.5±1.5  | $K = 1, L = 3, F = 32$        | MPSN-NODE  | 98.2±0.8  | $K = 2, L = 2, F = 32$        |
| MPSN-NODE  | 98.1±0.5  | $K = 2, L = 3, F = 32$        | SCCNN-EDGE | 98.9±0.5  | $K = 1, L = 3, F = 32, T = 5$ |
| SCCNN-EDGE | 97.9±0.9  | $K = 1, L = 3, F = 32, T = 5$ | SCCNN-EDGE | 99.2±0.4  | $K = 2, L = 5, F = 32, T = 5$ |
| SCCNN-EDGE | 95.9±1.0  | $K = 2, L = 5, F = 32, T = 3$ | SCCNN-EDGE | 99.0±1.0  | $K = 3, L = 5, F = 32, T = 5$ |
| BUNCH-EDGE | 97.3±1.1  | $K = 1, L = 4, F = 32$        | MPSN-EDGE  | 96.3±1.1  | $K = 1, L = 3, F = 32$        |
| BUNCH-EDGE | 94.6±1.2  | $K = 2, L = 4, F = 32$        | MPSN-EDGE  | 98.3±0.8  | $K = 2, L = 3, F = 32$        |
| MPSN-EDGE  | 94.1±2.4  | $K = 1, L = 3, F = 32$        | SCCNN-TRI. | 97.9±0.7  | $K = 2, L = 4, F = 32, T = 4$ |
| MPSN-EDGE  | 97.0±1.2  | $K = 2, L = 2, F = 16$        | SCCNN-TRI. | 97.4±0.9  | $K = 3, L = 4, F = 32, T = 4$ |
|            |           |                               | MPSN-TRI.  | 99.1±0.2  | $K = 2, L = 3, F = 32$        |

**Missing Components in SCCNNs.** With a focus on 2-simplex prediction with SCCNN-Node of order one, to avoid overcrowded settings, we study how each component of an SCCNN influences the prediction. We consider the following settings without: 1) “Edge-to-Node”, where the projection  $\mathbf{x}_{0,u}$  from edge to node is not included, equivalent to GNN; 2) “Node-to-Node”, where for node output, we have  $\mathbf{x}_0^l = \sigma(\mathbf{H}_{0,u}^l \mathbf{R}_{1,u} \mathbf{x}_1^{l-1})$ ; 3) “Node-to-Edge”, where the projection  $\mathbf{x}_{1,d}$  from node to edge is not included, i.e., we have  $\mathbf{x}_1^l = \sigma(\mathbf{H}_1^l \mathbf{x}_1^{l-1})$ ; and 4) “Edge-to-Edge”, where for edge output, we have  $\mathbf{x}_1^l = \sigma(\mathbf{H}_{1,d}^l \mathbf{R}_{1,d} \mathbf{x}_0^{l-1})$ .

Table F.4: 2-Simplex prediction (SCCNN-Node without certain components or with limited inputs).

| Missing Component | AUC      | Parameters             | Missing Input     | AUC      | Parameters             |
|-------------------|----------|------------------------|-------------------|----------|------------------------|
| —                 | 98.7±0.5 | $L = 2, F = 32, T = 2$ | —                 | 98.7±0.5 | $L = 2, F = 32, T = 2$ |
| Edge-to-Node      | 93.9±0.8 | $L = 5, F = 32, T = 2$ | Node input        | 98.2±0.5 | $L = 2, F = 32, T = 4$ |
| Node-to-Node      | 98.7±0.4 | $L = 4, F = 32, T = 2$ | Edge input        | 98.1±0.4 | $L = 2, F = 32, T = 3$ |
| Edge-to-Edge      | 98.5±1.0 | $L = 3, F = 32, T = 3$ | Node, Edge inputs | 50.0±0.0 | —                      |
| Node-to-Edge      | 98.8±0.3 | $L = 4, F = 32, T = 3$ |                   |          |                        |

From the results in Table F.4 (Left), we see that “No Edge-to-Node”, i.e., GNN, gives much worse results as it leverages no information on edges with limited expressive power. For cases with other components missing, a similar performance can be achieved, however, at a cost of the model complexity, with either a higher convolution order or a larger number of layers  $L$ , while the latter in turn degrades the stability of the SCCNNs, as discussed in Section 5. As studied by [17 Thm. 6], SCCNNs with certain inter-simplicial couplings pruned/missing can be powerful as well for simplicial WC test, but if we did not consider certain component, it comes with a cost of complexity which might degrade the model stability if more number layers are required.

**Limited Input.** We study the influence of limited input data for model SCCNN-Node of order two. Specifically, we consider the input on either nodes or edges is missing. From Table F.4, we see that the prediction performance does not deteriorate at a cost of the model complexity (higher convolution orders) when a certain part of the input missing except with full zeros as input. This ability of learning from limited data shows the robustness of SCCNNs.

### F.3.7 Stability Analysis

We then perform a stability analysis of SCCNNs. We artificially add perturbations to the normalization matrices when defining the Hodge Laplacians, which resemble the weights of simplices. We consider small perturbations  $\mathbf{E}_0$  on node weights which is a diagonal matrix following that  $\|\mathbf{E}_0\| \leq \epsilon_0/2$ . We generate its diagonal entries from a uniform distribution  $[-\epsilon_0/2, \epsilon_0/2)$  with  $\epsilon_0 \in [0, 1]$ , which represents one degree of deviation of the node weights from the true ones. Similarly, perturbations on edge weights and triangle weights are applied to study the stability. In a SCCNN-Node for 2-simplex prediction of  $K = 2$ , we measure the distance between the simplicial outputs with and without perturbations on nodes, edges, and triangles, i.e.,  $\|\mathbf{x}_k^L - \hat{\mathbf{x}}_k^L\|/\|\mathbf{x}_k^L\|$ , for  $k = 0, 1, 2$ .

**Stability Dependence.** We first show the stability mutual dependence between different simplices in Fig. F.2. We see that under perturbation on node weights, triangle output is not influenced until the number of layers becomes two; likewise, node output is not influenced by perturbations on triangle weights with a one-layer SCCNN. Also, a one-layer SCCNN under perturbations on edge weights will cause outputs on nodes, edges, triangles perturbed. Lastly, we observe that the same degree of perturbations added to different simplices causes different degrees of instability, owing to the number  $n_k$  of  $k$ -simplices in the stability bound. Since  $N_0 < N_1 < N_2$ , the perturbations on node weights cause less instability than those on edge and triangle weights.

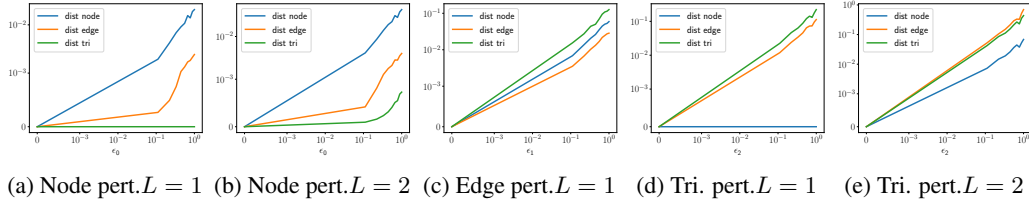

Figure F.2: The stabilities of different simplicial outputs are dependent on each other.

**Number of Layers.** Fig. F.3 shows that the stability of SCCNNs degrades as the number of layers increases as studied in Theorem 12. As the NN deepens, the stability deteriorates, which corresponds to our analysis of using shallow layers.

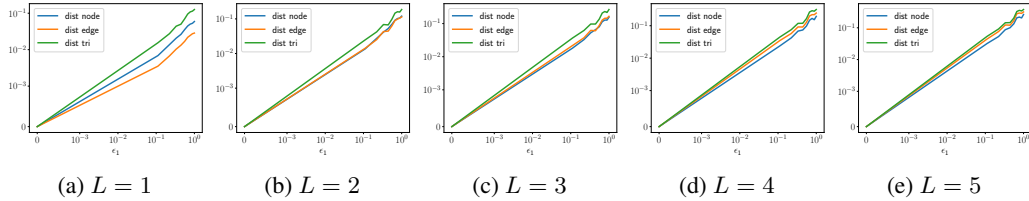

Figure F.3: The stability of SCCNNs in terms of different numbers of layers. We consider perturbations on edge weights.

## F.4 Additional details on Trajectory prediction

### F.4.1 Problem Formulation

A trajectory of length  $m$  can be modeled as a sequence of nodes  $[v_0, v_1, \dots, v_{m-1}]$  in an SC. The task is to predict the next node  $v_m$  from the neighbors of  $v_{m-1}$ ,  $\mathcal{N}_{v_{m-1}}$ . The algorithm in [16] first represents the trajectory equivalently as a sequence of oriented edges  $[[v_0, v_1], [v_1, v_2], \dots, [v_{m-2}, v_{m-1}]]$ . Then, an edge flow  $\mathbf{x}_1$  is defined, whose value on an edge  $e$  is  $[\mathbf{x}_1]_e = 1$  if edge  $e$  is traversed by the

trajectory in a forward direction,  $[\mathbf{x}_1]_e = -1$  if edge  $e$  is traversed in a backward direction by the trajectory, and  $[\mathbf{x}_1]_e = 0$ , otherwise.

With the trajectory flow  $\mathbf{x}_1$  as the input, together with zero inputs on the nodes and triangles, an SCCNN of order two is used to generate a representation  $\mathbf{x}_1^L$  of the trajectory, which is the output on edges. This is followed by a projection step  $\mathbf{x}_{0,u}^L = \mathbf{B}_1 \mathbf{W} \mathbf{x}_1^L$ , where the output is first passed through a linear transformation via  $\mathbf{W}$ , then projected into the node space via  $\mathbf{B}_1$ . Lastly, a distribution over the candidate nodes  $\mathcal{N}_{v_{m-1}}$  is computed via a softmax operation,  $\mathbf{n}_j = \text{softmax}([\mathbf{x}_{0,u}^L]_j)$ ,  $j \in \mathcal{N}_{v_{m-1}}$ . The best candidate is selected as  $v_m = \text{argmax}_j \mathbf{n}_j$ . We refer to [13, Alg. S-2] for more details.

Given that an SCCNN of order two generates outputs also on nodes, we can directly apply the node feature output  $\mathbf{x}_0^L$  to compute a distribution over the candidate nodes  $\mathcal{N}_{v_{m-1}}$  without the projection step. We refer to this as SCCNN-Node, and the method of using the edge features with the projection step as SCCNN-Edge.

## F.4.2 Model

In this experiment, we consider the following methods: 1) PSNN by [16]; 2) SNN by [15]; 3) SCNN by [19] where we consider different lower and upper convolution orders  $T_d, T_u$ ; and 4) Bunch by [14] where we consider both the node features and edge features, namely, Bunch-Node and Bunch-Edge.

**Synthetic Data.** Following the procedure in [41], we generate 1000 trajectories as follows. First, we create an SC with two “holes” by uniformly drawing 400 random points in the unit square, and then a Delaunay triangulation is applied to obtain a mesh, followed by the removal of nodes and edges in two regions. To generate a trajectory, we consider a starting point at random in the lower-left corner, and then connect it via a shortest path to a random point in the upper left, center, or lower-right region, which is connected to another random point in the upper-right corner via a shortest path.

We consider the random walk Hodge Laplacians [41]. For Bunch method, we set the shifting matrices as the simplicial adjacency matrices defined in [14]. We consider different NNs with three intermediate layers where each layer contains  $F = 16$  intermediate features. The tanh nonlinearity is used such that the orientation equivariance holds. The final projection  $\mathbf{n}$  generates a node feature of dimension one. In the 1000-epoch training, we use the cross-entropy loss function between the output  $\mathbf{d}$  and the true candidate and we consider an adam optimizer with a learning rate of 0.001 and a batch size 100. To avoid overfitting, we apply a weight decay of  $5 \cdot 10^{-6}$  and an early stopping.

As done in [16], besides the standard trajectory prediction task, we also perform a reverse task where the training set remains the same but the direction of the trajectories in the test set is reversed and a generalization task where the training set contains trajectories running along the upper left region and the test set contains trajectories around the other region. We evaluate the correct prediction ratio by averaging the performance over 10 different data generations.

**Real Data.** We also consider the Global Drifter Program dataset from <http://www.aoml.noaa.gov/envids/gld/>, localized around Madagascar. It consists of ocean drifters whose coordinates are logged every 12 hours. An SC can then be created as [41] by treating each mesh as a node, connecting adjacent meshes via an edge and filling the triangles, where the “hole” is yielded by the island. Following the process in [16], it results in 200 trajectories and we use 180 of them for training. In the training, a batch size of 10 is used and no weight decay is used. The rest experiment setup remains the same as the synthetic case.

## F.4.3 Results

We report the prediction accuracy of different tasks for both datasets in Table F.5. We first investigate the effects of applying higher-order SCFs in the simplicial convolution and accounting for the lower and upper contributions. From the standard accuracy for both datasets, we observe that increasing the convolution orders improves the prediction accuracy, e.g., SCNNs become better as the orders  $T_d, T_u$  increase and perform always better than PSNN, and SCCNNs better than Bunch. Also, differentiating the lower and upper convolutions does help improve the performance as SCNN of orders  $T_d = T_u = 3$  performs better than SNN of  $T = 3$ .

However, accounting for the node and triangle contributions in SCCNNs does not help the prediction compared to the SCNNs, likewise for Bunch compared to PSNN. This is due to the zero node and

triangle inputs because there are no available node and triangle features. Similarly, the prediction directly via the node output features is not accurate compared to projection from edge features. Moreover, we also observe that the performance of SCCNNs that are trained with the same data does not deteriorate in the reverse task because the orientation equivariance ensures SCCNNs to be unaffected by the orientations of the simplicial data. Lastly, we see that, like other NNs on SCs, SCCNNs have good transferability to the unseen data.

Table F.5: Trajectory Prediction Accuracy. (Left): Synthetic trajectory in the standard, reverse and generalization tasks. (Right): Ocean drifter trajectories. For SCCNNs, we set the lower and upper convolution orders  $T_d, T_u$  to be the same as  $T$ .

| METHODS    | STANDARD | REVERSE  | GENERALIZATION | PARAMETERS      | STANDARD | PARAMETERS      |
|------------|----------|----------|----------------|-----------------|----------|-----------------|
| PSNN       | 63.1±3.1 | 58.4±3.9 | 55.3±2.5       | —               | 49.0±8.0 | —               |
| SCNN       | 65.6±3.4 | 56.6±6.0 | 56.1±3.6       | $T_d = T_u = 2$ | 52.5±9.8 | $T_d = T_u = 2$ |
| SCNN       | 66.5±5.8 | 57.7±5.4 | 60.6±4.0       | $T_d = T_u = 3$ | 52.5±7.2 | $T_d = T_u = 3$ |
| SCNN       | 67.3±2.3 | 56.9±4.8 | 59.4±4.2       | $T_d = T_u = 4$ | 52.5±8.7 | $T_d = T_u = 4$ |
| SCNN       | 67.7±1.7 | 55.3±5.3 | 61.2±3.2       | $T_d = T_u = 5$ | 53.0±7.8 | $T_d = T_u = 5$ |
| SNN        | 65.5±2.4 | 53.6±6.1 | 59.5±3.7       | $T = 3$         | 52.5±6.0 | $T = 3$         |
| BUNCH-NODE | 35.4±3.4 | 38.1±4.6 | 29.0±3.0       | —               | 35.0±5.9 | —               |
| BUNCH-EDGE | 62.3±4.0 | 59.6±6.1 | 53.9±3.1       | —               | 46.0±6.2 | —               |
| SCCNN-NODE | 46.8±7.3 | 44.5±8.2 | 31.9±5.0       | $T = 1$         | 40.5±4.7 | $T = 1$         |
| SCCNN-EDGE | 64.6±3.9 | 57.2±6.3 | 54.0±3.0       | $T = 1$         | 52.5±7.2 | $T = 1$         |
| SCCNN-NODE | 43.5±9.6 | 44.4±7.6 | 32.8±2.6       | $T = 2$         | 45.5±4.7 | $T = 2$         |
| SCCNN-EDGE | 65.2±4.1 | 58.9±4.1 | 56.8±2.4       | $T = 2$         | 54.5±7.9 | $T = 2$         |

#### F.4.4 Convolution Order and Integral Lipschitz Property

We investigate the effect of the integral Lipschitz property of the SCFs in an NN on SC. To do so, given an NN on SCs with an SCF  $\mathbf{H}_k$  for  $k$ -simplicial signals, we add the following integral Lipschitz regularizer to the loss function during training so to promote the integral Lipschitz property

$$r_{\text{IL}} = \|\lambda_{k,G} \tilde{h}'_{k,G}(\lambda_{k,G})\| + \|\lambda_{k,C} \tilde{h}'_{k,C}(\lambda_{k,C})\| = \left\| \sum_{t=0}^{T_d} t w_{k,d,t} \lambda_{k,G}^t \right\| + \left\| \sum_{t=0}^{T_u} t w_{k,u,t} \lambda_{k,C}^t \right\| \quad (\text{F.1})$$

for  $\lambda_{k,G} \in \{\lambda_{k,G,i}\}_{i=1}^{n_{k,G}}$  and  $\lambda_{k,C} \in \{\lambda_{k,C,i}\}_{i=1}^{n_{k,C}}$ , which are the gradient and curl frequencies. To avoid computing the eigendecomposition of the Hodge Laplacian, we can approximate the true frequencies by sampling certain number of points in the frequency band  $(0, \lambda_{k,G,m}]$  and  $(0, \lambda_{k,C,m}]$  where the maximal gradient and curl frequencies can be computed by efficient algorithms, e.g., power iteration [69, 70].

Here, to illustrate that the integral Lipschitz property of the SCFs helps the stability of NNs on SCs, we consider the effect of regularizer  $r_{\text{IL}}$  against perturbations in PSNNs and SCNNs with different  $T_d$  and  $T_u$  for the standard synthetic trajectory prediction. The regularization weight on  $r_{\text{IL}}$  is set as  $5 \cdot 10^{-4}$  and the number of samples to approximate the frequencies is set such that the sampling interval is 0.01.

Fig. F.4 shows the prediction accuracy and the relative distance between the edge outputs of the NNs trained with and without the integral Lipschitz regularizer in terms of different levels of perturbations. We see that the integral Lipschitz regularizer helps the stability of the NNs, especially for large SCF orders, where the edge output is less influenced by the perturbations compared to without the regularizer. Meanwhile, SCNN with higher-order SCFs, e.g.,  $T_d = T_u = 5$ , achieves better prediction than PSNN (with one-step simplicial shifting), while maintaining a good stability with its output not influenced by perturbations drastically.

We also measure the lower and upper integral Lipschitz constants of the trained NNs across different layers and features, given by  $\max_{\lambda_{k,G}} |\lambda_{k,G} \tilde{h}_{k,G}(\lambda_{k,G})|$  and  $\max_{\lambda_{k,C}} |\lambda_{k,C} \tilde{h}_{k,C}(\lambda_{k,C})|$ , shown in Fig. F.5. We see that the SCNN trained with  $r_{\text{IL}}$  indeed has smaller integral Lipschitz constants than the one trained without the regularizer, thus, a better stability, especially for NNs with higher-order SCFs.

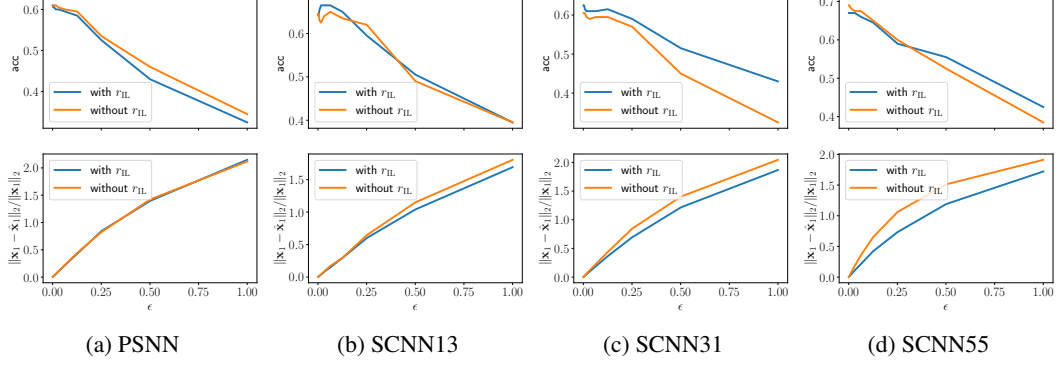

Figure F.4: Effect of the integral Lipschitz regularizer  $r_{\text{IL}}$  in the task of synthetic trajectory prediction against different levels  $\epsilon$  of random perturbations on  $\mathbf{L}_{1,d}$  and  $\mathbf{L}_{1,u}$ . We show the accuracy (Top row) and the relative distance between the edge output (Bottom row) for different NNs on SCs with and without  $r_{\text{IL}}$ . SCNN13 is the SCNN with  $T_d = 1$  and  $T_u = 3$ .

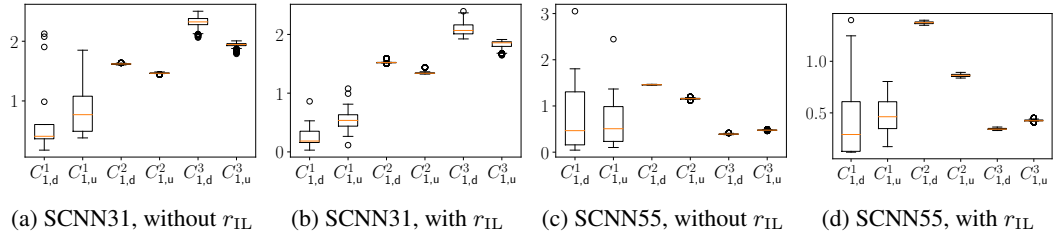

Figure F.5: The integral Lipschitz constants of SCFs at each layer of the trained SCNNs with and without the integral Lipschitz regularizer  $r_{\text{IL}}$ . We use symbols  $c^l_{k,d}$  and  $c^l_{k,u}$  to denote the lower and upper integral Lipschitz constants at layer  $l$ . Regularizer  $r_{\text{IL}}$  promotes the integral Lipschitz property, thus, the stability, especially for NNs with large SCF orders.
